# Dinámica distributiva de flujos bifásicos con carga de madera en un abanico aluvial experimental

## *Distributary behavior of biphasic flows with wood load on an experimental alluvial fan*

Santibáñez, N.<sup>a</sup>, Mazzorana, B.<sup>b1\*</sup>, Iribarren, P.<sup>b2</sup>, Mao, L.<sup>b3</sup>, Rojas, I.<sup>b3</sup>

<sup>a</sup>Escuela de Graduados, Facultad de Ciencias, Universidad Austral de Chile, 5090000 Valdivia, Chile.

<sup>b</sup>Instituto de Ciencias de la Tierra, Facultad de Ciencias, Universidad Austral de Chile, 5090000 Valdivia, Chile.

<sup>c</sup>School of Geography, College of Science, University of Lincoln, Lincoln LN67TS, UK.

E-mail: <sup>a1</sup>nicole.santibanez@alumnos.uach.cl, <sup>b1</sup>bruno.mazzorana@uach.cl, <sup>b2</sup>pablo.iribarren@uach.cl, <sup>c</sup>lumao@lincoln.ac.uk, <sup>b3</sup>ivan.rojas@uach.cl

\*Autor para correspondencia

Recibido: 29/11/2020

Aceptado: 06/04/2021

Publicado: 30/04/2021

**Citar como:** Santibáñez, N., Mazzorana, B., Iribarren, P., Mao, L., Rojas, I. 2021. Distributary behavior of biphasic flows with wood load on an experimental alluvial fan. *Ingeniería del agua*, 25(2), 145-168. <https://doi.org/10.4995/ia.2021.14703>

## RESUMEN

Los abanicos aluviales se ven afectados episódicamente por la dinámica distributiva generada por procesos de flujo bifásico extremos. El sedimento inorgánico no es el único componente de la fracción sólida de los flujos bifásicos; también hay que considerar la carga de madera de gran tamaño. Siguiendo un enfoque experimental, el objetivo fue evaluar, en un modelo físico, la aleatoriedad de la morfodinámica y de la exposición asociadas a un conjunto de condiciones de carga específicas. Se exploró, además, cómo cambian estos patrones si se agrega madera de gran tamaño a la mezcla bifásica en una proporción fija de la fracción sólida. Variando sistemáticamente las condiciones de carga, se ejecutaron dos conjuntos de experimentos, uno con y otro sin una proporción fija de la fracción sólida constituida por madera de gran tamaño. Los resultados obtenidos confirman que los patrones de exposición asociados a una misma carga de sedimentos exhiben una notable aleatoriedad, que la potencia de la corriente aplicada ejerce un efecto decisivo en esos patrones y que la porción fija de madera de gran tamaño interfiere fuertemente con la dinámica distributiva de flujos bifásicos en abanicos aluviales.

**Palabras clave** | abanico aluvial, modelo experimental, flujos bifásicos, dinámica distributiva, madera de gran tamaño (LW).

## ABSTRACT

*Alluvial fans are episodically affected by the distributary dynamics caused by extreme biphasic flow processes. The solid-fraction component of biphasic flows is generally represented by inorganic sediment, but these events may also carry significant amounts of large wood. The aim of the study was to assess on a physical alluvial fan model the randomness of morphodynamical processes and exposure associated to a set of specific loading conditions and at exploring how these patterns change if large wood is added to the biphasic mixture in a fixed proportion of the solid fraction. The experiments were conducted varying systematically the total volume, the sediment fraction of the biphasic mixture and the applied stream power. Two sets of experiments were run, either with and without a fixed proportion of the solid fraction constituted by large wood. Our results confirm that the exposure associated to specific loading conditions exhibits a remarkable randomness, that the applied stream power has a decisive effect on the variability of exposure and that the fixed portion of large wood strongly interfere with the distributary dynamics on alluvial fans.*

**Key words** | alluvial fan, experimental model, biphasic flows, distributive dynamics, large wood (LW).

## INTRODUCCIÓN

En los últimos años ha existido un renovado interés en la geomorfología experimental en general, específicamente en el estudio experimental de la dinámica distributiva de los abanicos aluviales (Clarke, 2015; Clarke *et al.*, 2010; De Haas *et al.*, 2018; Mazzorana *et al.*, 2020). De hecho, los abanicos aluviales son formas terrestres que exhiben, tanto en el espacio como en el tiempo, una dinámica particular (Sheets *et al.*, 2002; Reitz *et al.*, 2010; Sturm *et al.*, 2018a, 2018b). Los esfuerzos de investigación de los abanicos aluviales se han dedicado, por un lado, a desentrañar la interacción subyacente entre los procesos y las geoformas (Sheets *et al.*, 2002; Reitz *et al.*, 2010; Clarke, 2015) y a entender, por el otro, las implicancias tanto para la evaluación de los peligros como de los riesgos asociados a la dinámica distributiva (Mazzorana *et al.*, 2017; Mazzorana *et al.*, 2020).

Según Clarke (2015) los abanicos aluviales son sistemas deposicionales que se forman debido a una diferencia neta entre la capacidad de transporte de sedimentos aguas arriba y aguas abajo. Frecuentemente se originan en la base de los frentes de las montañas a medida que los ríos emergen de las áreas montañosas confinadas y pueden fluir sin confinamiento hacia la llanura. Estas geoformas son aproximadamente simétricas con respecto a un eje longitudinal que pasa a través de su vértice. La mayoría de los abanicos aluviales tienen una pendiente relativamente constante (Guerit *et al.*, 2014) y también exhiben perfiles en sección transversal convexo-planos (Blair y McPherson, 2009). Por lo general se extienden entre 0.5 y 10 km desde el frente de la montaña (Anstey, 1965; Blair y McPherson, 2009) pero los más grandes incluso alcanzan una extensión de 20 km (Blair, 2003; Blair y McPherson, 2009). En todo el mundo, las instituciones responsables y las comunidades locales ignoran a menudo el riesgo relacionado con la dinámica distributiva en los abanicos aluviales (Mazzorana *et al.*, 2020). Esto puede generar considerables pérdidas económicas para las comunidades afectadas (Mazzorana y Fuchs, 2010; Fuchs *et al.*, 2017a, 2017b). Dentro del dominio de las ciencias naturales, el riesgo se considera como función de la probabilidad de ocurrencia del escenario de peligro subyacente (Mazzorana *et al.*, 2012), de la exposición (Fuchs *et al.*, 2015), de la vulnerabilidad de los elementos expuestos al peligro (Papathoma-Köhle *et al.*, 2017) y su valor económico (Fuchs, 2009; Mazzorana y Fuchs, 2010; Mazzorana *et al.*, 2012). Especialmente en los valles alpinos el riesgo está aumentando ya que las personas continúan mudándose con fines residenciales a estas áreas propensas a inundaciones, o porque estas geoformas han sido desde hace mucho tiempo áreas con vocación agrícola (Pelletier *et al.*, 2005; Santangelo *et al.*, 2011; Kain *et al.*, 2018).

Al considerar también el cambio climático y la mayor frecuencia de fenómenos hidrológicos extremos (De Haas *et al.*, 2018), la exposición puede exacerbarse debido a crecidas más intensas (Antronico *et al.*, 2015), incrementando el riesgo. Por lo tanto, es vital intentar reducir de forma preventiva la exposición al peligro (Röthlisberger *et al.*, 2017) e implementar estrategias de adaptación eficaces (Mazzorana y Fuchs, 2010; Mazzorana *et al.*, 2018).

No obstante cada país tenga legislaciones específicas sobre los requerimientos formales para delimitar áreas de riesgo de inundación, en general estas se basan en los mapas de peligro de inundación (Kienholz *et al.*, 2004). Legislaciones como la Directiva Europea 2007/60 de evaluación y gestión de riesgo de inundaciones, recomienda evaluar el peligro de inundación a partir de mapas de inundación con calados y velocidades de los flujos asociados a los eventos extremos de referencia. Generalmente, a partir de hidrogramas y sedimentogramas de crecidas para los tiempos de retorno de los eventos pluviométricos considerados, se realizan las simulaciones hidrodinámicas con modelos computacionales adecuados para obtener una representación espacialmente explícita de las intensidades de los procesos (Chow, 1994), específicamente en los abanicos aluviales afectados. Sin embargo, se reconoce cada vez más que la evaluación del peligro en los abanicos aluviales puede verse afectada por diferentes fuentes de incertidumbre (Mazzorana *et al.*, 2018).

En primer lugar, las múltiples respuestas hidrológicas se remontan a un evento de precipitación con un período de retorno especificado (Chow, 1994). Estas respuestas hidrológicas tienen el potencial de dar lugar a una variedad de flujos bifásicos dependiendo de la conectividad de fuentes de sedimentos y de la disponibilidad espacio – temporal de sedimentos y de madera de gran tamaño (*Large Wood* según la terminología inglesa y a continuación abreviado con LW) en el contexto de los procesos contributivos que se desarrollan a escala de cuenca (Ruiz-Villanueva *et al.*, 2019). Los diferentes flujos bifásicos resultantes pueden, a su vez, interactuar con obstáculos específicos, agregando más complejidad y aleatoriedad a la determinación de las intensidades del proceso en la superficie del abanico aluvial afectado (Gschnitzer *et al.*, 2017).

En la práctica profesional se considera que la propagación del flujo bifásico sea un proceso esencialmente determinístico que puede, en principio, representarse con suficiente precisión mediante el uso de modelos hidrodinámicos *ad hoc* que implementan la reología adecuada (Rosatti y Fraccarollo, 2006; Rosatti y Begnudelli, 2013). Sin embargo, la evidencia experimental indica la importancia primordial de los fenómenos autógenos (es decir, bifurcaciones, avulsiones, canalizaciones espontáneas, depositación remontante, etc.) en la co-determinación de los efectos morfológicos en la superficie del abanico aluvial.

Según lo informado por Whipple *et al.* (1998), Muto *et al.* (2007), y Van Dijk *et al.* (2012) los procesos autógenos pueden desempeñar un papel crucial en la determinación de la exposición en los abanicos aluviales, ya que crean patrones de propagación aleatorios. La complejidad de la dinámica distributiva es, de hecho, notable y predecir los comportamientos autógenos tanto espacial como temporalmente constituye un desafío importante (De Haas *et al.*, 2018).

Mazzorana *et al.* (2020) analizaron las complejas interacciones entre los parámetros de carga del sistema y la dinámica distributiva incluyendo los procesos de depósito, de avulsión y de canalización espontánea que, operando conjuntamente, determinan la exposición del abanico aluvial, es decir la superficie de esta geoforma impactada por el flujo bifásico. Todas las variables empleadas para los experimentos tuvieron una relación positiva con la exposición, pero más de un experimento demostró que una exposición más alta no siempre correspondía a valores más altos de los parámetros de carga tales como el volumen total (agua más sedimento), la fracción de sedimento y la potencia del flujo empleada. Dado que este estudio consideró solo una ejecución experimental para cada combinación de parámetros de carga, las respuestas no lineales detectadas podrían haber ocultado un componente aleatorio posiblemente debido a fenómenos autógenos.

Por lo tanto, si la dinámica distributiva en los abanicos aluviales se caracterizara por un componente aleatorio, las implicancias para la evaluación de riesgos posterior podrían ser de gran alcance. Por un lado, sería necesario encontrar formas adecuadas de incorporar “elementos de comportamiento aleatorio” en una simulación determinística de la propagación de los flujos bifásicos o, por otro lado, serían necesarios estudios experimentales enfocados en representar la multiplicidad de los procesos y geoformas resultantes.

Los modelos experimentales de abanicos aluviales son herramientas de investigación útiles para estudiar procesos bifásicos y han sido ampliamente utilizados por hidrogeomorfólogos (Hooke, 1968; D’Agostino *et al.*, 2010; Clarke, 2015). Su uso permitió esclarecer los factores primarios que influyen en la dinámica de los abanicos aluviales, como la pendiente (Hooke, 1968; Guerit *et al.*, 2014), las avulsiones (Bryant *et al.*, 1995; Reitz y Jerolmack, 2012), los procesos autógenos (Muto *et al.*, 2007; Van Dijk *et al.*, 2012) y el riesgo (Davies *et al.*, 2003). Sin embargo, este enfoque no está exento de limitaciones. La primera consideración a la hora de planificar modelos experimentales es la que se refiere al escalamiento, en donde las dimensiones del modelo se deben ajustar a las dimensiones del prototipo según relaciones adimensionales. Tratándose de sistemas que incluyen dinámica de flujo, usualmente se ocupan los Números de Reynolds y de Froude (Peakall *et al.*, 1996). Sin embargo, cuando hay también procesos asociados con transporte de sedimentos, morfodinámica, y materiales de varias densidades, es extremadamente difícil ajustar las dimensiones del modelo a un escalamiento dinámico. Esto se debe a que no se pueden ocupar fluidos con viscosidad cinemática inferior a la del agua y dificultad en escalar fuentes de rugosidad de baja escala como la rugosidad de grano (Paola *et al.*, 2009). Por esta razón, en varios experimentos que buscan estudiar fenómenos geomorfológicos similares complejos y sujetos a un alto nivel de no-linealidad, se disminuye la necesidad de escalar cabalmente las relaciones físicas adimensionales, y se opta por experimentos que puedan reproducir los patrones espaciales y la cinemática de los procesos observados en terreno (Paola *et al.*, 2009; Sturm *et al.*, 2018a, 2018b). En este estudio se adoptó entonces un enfoque experimental basado en el concepto de similitud de proceso (Hooke, 1968; Paola *et al.*, 2009) que busca reproducir patrones y dinámica geomorfológica más que relaciones lineales escaladas a partir de un prototipo. Por lo tanto, en lugar de intentar escalar un prototipo del mundo real e intentar representar la dinámica distributiva de un evento observado en terreno, se propicia la emergencia de la aleatoriedad desde el modelo mismo corriendo múltiples experimentos asociados a las mismas condiciones de carga del sistema. De hecho, los modelos de laboratorio logran capturar la esencia de muchos procesos importantes que ocurren en los sistemas naturales, lo que revela una aparente independencia de escala (Paola *et al.*, 2009). El hecho de que muchos experimentos logren reproducir macroscópicamente las geo-formas en el sentido de una similitud externa aun cuando los experimentos no cumplan con los requisitos del escalado dinámico clásico se le conoce como la “efectividad irracional”. Además, una similitud interna de los procesos no sería necesaria para que emergieran patrones geomorfológicos caracterizados por presentar una similitud externa.

Este estudio experimental apunta específicamente a descifrar la dinámica distributiva de los flujos bifásicos en abanicos aluviales, tanto cargados de madera de gran tamaño como no, identificando los “elementos de comportamiento aleatorio” y determinando la exposición al peligro resultante. En particular a) examinamos la variabilidad de los patrones de exposición asociados a los flujos bifásicos generados por condiciones de carga específicas, b) exploramos cómo estos patrones pueden cambiar al agregar madera de gran tamaño a la mezcla bifásica en una proporción fija de la fracción sólida, e c) investigamos como las condiciones de carga y los procesos autógenos, vistos en conjunto, ejercen una influencia tangible en la exposición.

## MATERIALES Y MÉTODOS

El diagrama de flujo representado en la Figura 1 detalla las principales etapas de la investigación experimental, precisa sucintamente los métodos empleados y las herramientas utilizadas y especifica los resultados asociados a cada etapa de la investigación. La primera etapa de la investigación consistió en desarrollar y optimizar el diseño experimental y en escoger las técnicas de medición y grabación de la dinámica distributiva más adecuadas.

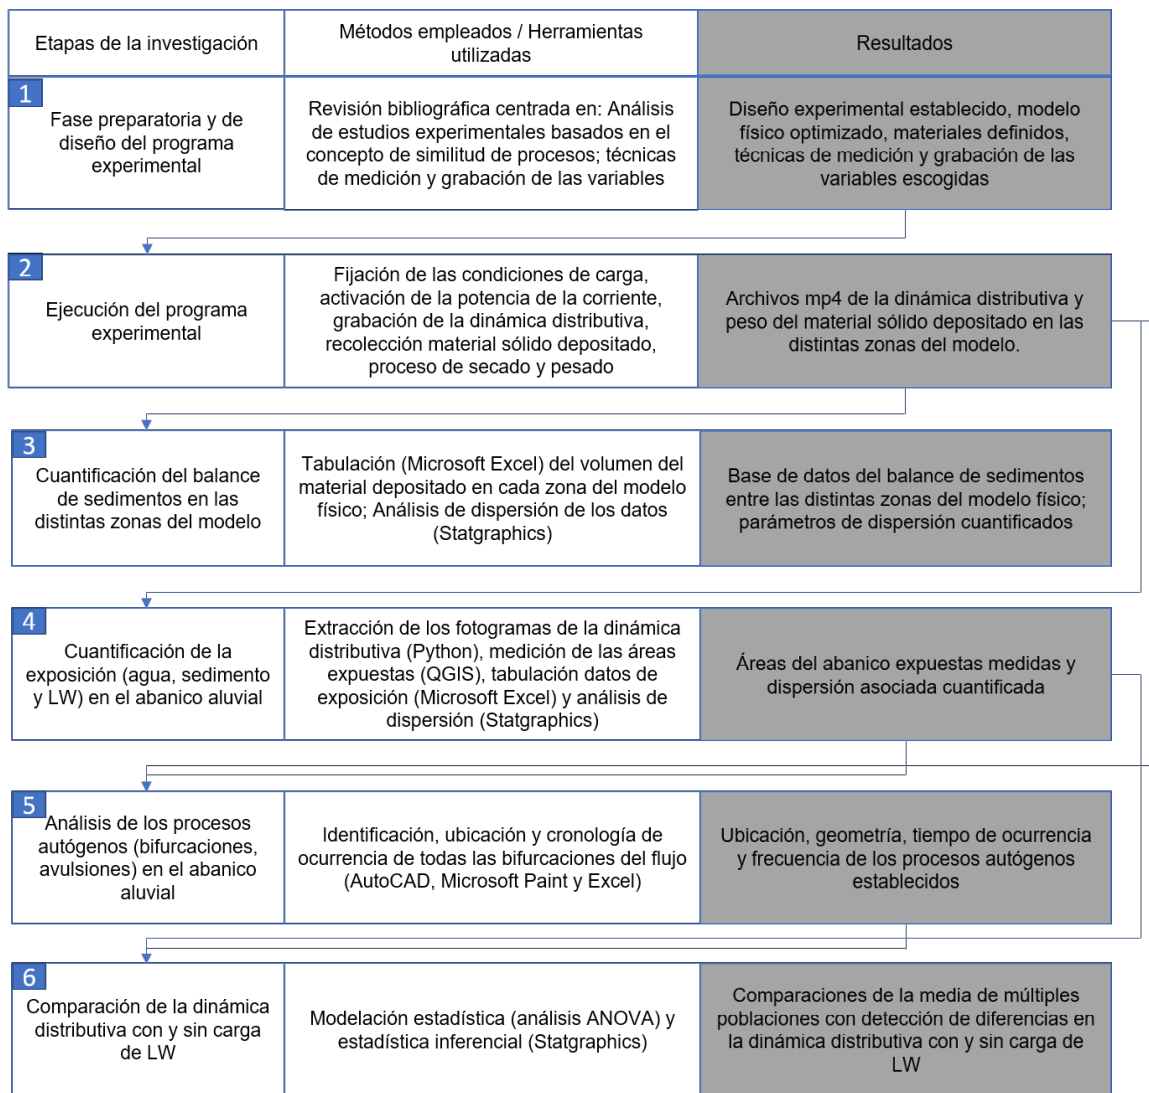

**Figura 1** | Diagrama de flujo con principales etapas de la investigación, métodos empleados, herramientas utilizadas y resultados obtenidos.

Para la ejecución del programa experimental diseñado (ver etapa 2 en la Figura 1) se empleó el modelo físico de abanico aluvial diseñado por Mazzorana *et al.* (2020). Una vez obtenidos los archivos mp4 de la dinámica distributiva de cada experimento, se procedió en cuantificar el peso y volumen del sedimento depositado en las distintas zonas del modelo para cada condición de carga y repetición (ver explicación detallada en los sub-apartados “Diseño experimental” y “Ejecución del programa experimental”). Se determinó el balance de sedimentos asociado a cada experimento ejecutado y calculó los parámetros de dispersión asociados (ver etapa 3 del flujo metodológico representado en Figura 1 y sub-apartado “Cuantificación del balance de sedimento y LW”).

En las etapas 4 y 5 del flujo metodológico (ver Figura 1) se determinó la exposición como uno de los factores relevantes del riesgo hidráulico generado por la dinámica distributiva, además se cuantificó y ubicó las avulsiones/bifurcaciones como análisis de los procesos autógenos en la superficie del abanico aluvial generada por la mezcla bifásica. En relación con las condiciones de carga aplicadas, se distinguió explícitamente entre una mezcla bifásica con y sin LW (añadido en una proporción fija del volumen sólido total). Los resultados en términos de exposición y avulsiones (cantidad, ubicación), fueron sometidos a un análisis estadístico inferencial con el fin de descifrar la influencia de cada variable (o de las interacciones entre ellas) en la exposición. Los detalles metodológicos se reportan en los sub-apartados “Cuantificación de la exposición en el abanico aluvial” y “Avulsiones: cantidad y distancia radial”.

## Modelo físico del abanico aluvial

En el laboratorio de Sedimentología del Instituto de Ciencias de la Tierra de la Universidad Austral de Chile se construyó un prototipo que representa un abanico aluvial para realizar experimentos con y sin madera de gran tamaño (Figura 2). Este consta de 4 piezas fundamentales: (1) Contenedor de agua, (2) Canal, (3) Abanico aluvial y (4) Piscina de recolección - Tamiz; además los materiales para simular el flujo bifásico y el sistema de grabación para el posterior análisis de datos (ver Mazzorana *et al.*, 2020 por mayores detalles).

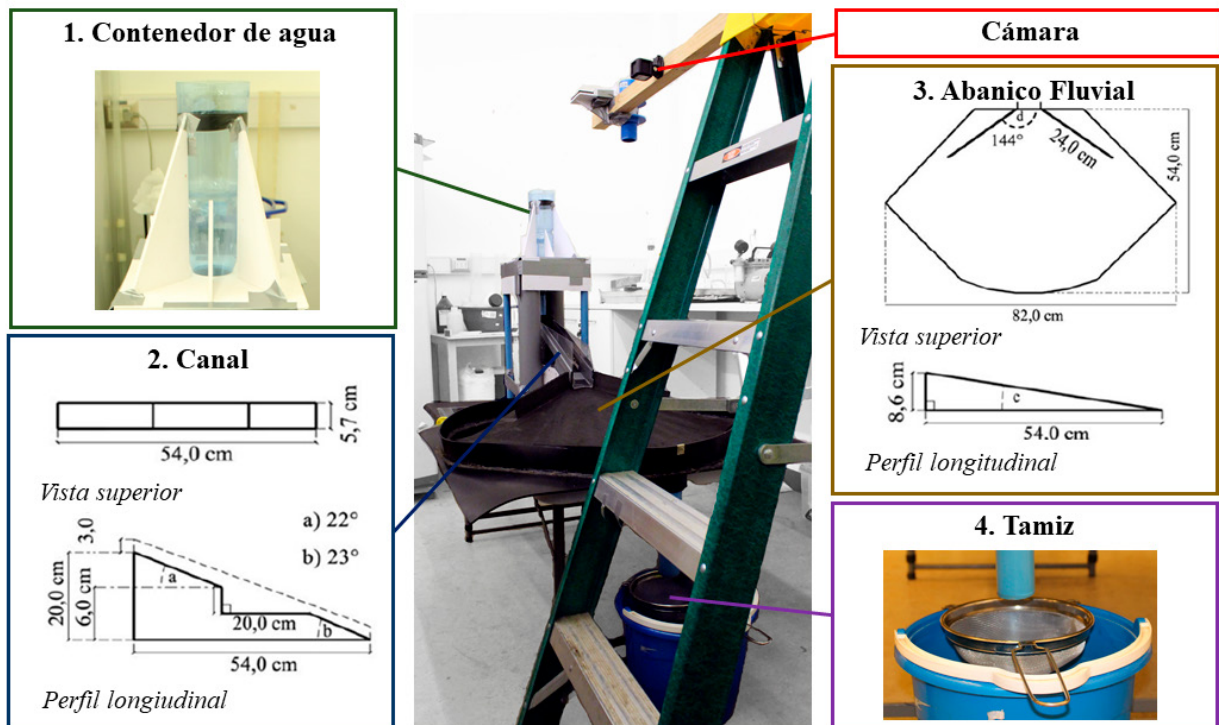

**Figura 2** | Abanico aluvial experimental instalado en el Laboratorio Sedimentología del Instituto de Ciencias de la Tierra de la Universidad Austral de Chile.

El abanico aluvial presenta una forma convexa típica, y está confeccionado de goma EVA, material que se caracteriza por tener una rugosidad superficial homogénea. Este se encuentra ubicado dentro de una piscina de caucho, con el fin de restringir la dispersión del material transportado que queda fuera de la superficie del abanico y guiarlo a un contenedor, identificado como tamiz. El abanico se encuentra conectado con un canal de 5.7 cm de ancho, sobre una longitud de 54 cm, el cual consta de 3 secciones con diferentes gradientes de pendientes: la primera sección es la que se coloca en contacto con el flujo del agua, el cual se encuentra a 26 cm de la base del apoyo, seguido de un paso abrupto para dar lugar a la segunda sección o sección intermedia, esta presenta una pendiente nula que actúa como almacenamiento del material que será transportado, quedando a 14 cm de la base del apoyo; y finalmente la última sección, presenta una pendiente más suave y es la que se enlaza con el abanico aluvial terminando a 8.6 cm de la base del apoyo.

El material ocupado está compuesto por cuarzo y madera. El cuarzo posee una densidad de 2.58 g/cm<sup>3</sup>, con un tamaño de grano 1<D<2 mm lo que es representativo del material empedrado. Por otro lado, la madera tiene una densidad de 0.7 g/cm<sup>3</sup>, con una longitud de 4.8 cm y 0.3 cm de diámetro, para simular elementos de madera de gran tamaño en el canal y en el abanico. La longitud de los troncos se determinó considerando como medida de referencia el ancho del canal, por lo que representa un 80% de este.

El flujo que impacta el material está controlado por un contenedor de agua que tiene una capacidad aproximada de 1.5 L, el cual se encuentra fijado sobre una plataforma elevada. Este contenedor posee una llave de paso, que regula la potencia de la corriente del flujo del agua. Para el diseño experimental se consideraron dos potencias, denominadas potencia de flujo media (PCH) donde la llave de paso se encuentra a 45° y potencia de flujo máxima (PCF) a 90°. La salida del flujo se encuentra a una altura de 40 cm de la base del sistema, justo donde se encuentra ubicada la llave de paso.

Respecto al sistema de grabación de los experimentos, se utilizaron dos tipos de cámara, en un principio fueron grabados mediante un celular Moto g5s que posee una resolución de 16 megapíxeles capaz de grabar videos a 1080p (resolución full HD) y posteriormente mediante una GoPro Hero Session, la cual posee un sensor de 8 megapíxeles capaz de grabar videos a 1080p (resolución full HD) a 60 fps (fotogramas por segundo). Para obtener una vista panorámica del abanico aluvial, se creó un soporte sobre este para el sistema de grabación, quedando a una altura de 146 cm del suelo y a 90 cm de la base del apoyo del abanico aluvial.

## Diseño experimental

Se realizaron experimentos donde la fracción sólida se compuso por (i) Cuarzo y (ii) Cuarzo y madera (Figura 3). Se realizaron experimentos con las respectivas condiciones de flujo, considerando la fracción sólida de material transportado (condiciones de carga inicial). Se efectuaron 8 repeticiones de cada experimento, para observar la variabilidad de la dinámica distributiva asociada a cada condición de carga. En total, se realizaron 288 experimentos (144 para la condición de carga cuarzo (i) y 144 para la condición de carga cuarzo y madera (ii)).

Para la condición de carga cuarzo (i), se utilizaron las ecuaciones 1 y 2 para determinar el volumen y la masa de los constituyentes sólidos y líquidos a partir de un volumen total dado, y para la condición de carga cuarzo y madera (ii), se utilizó la ecuación 1 nuevamente para obtener el volumen líquido y las ecuaciones 3 y 4 para determinar la masa de cuarzo y madera respectivamente. En la Tabla 1 se reportan las cargas usadas en los experimentos.

$$V_{agua} = (Vt * 1000) * \left( \frac{100 - \%Vs}{100} \right) \quad (1)$$

$$M_{cuarzo} = (Vt * 1000) * \left( \frac{\%Vs}{100} \right) * \rho_{cuarzo} \quad (2)$$

$$M_{cuarzo} = (Vt * 1000) * \left( \frac{\%Vs}{100} \right) * 0.9 * \rho_{cuarzo} \quad (3)$$

$$M_{madera} = (Vt * 1000) * \left( \frac{\%Vs}{100} \right) * 0.1 * \rho_{madera} \quad (4)$$

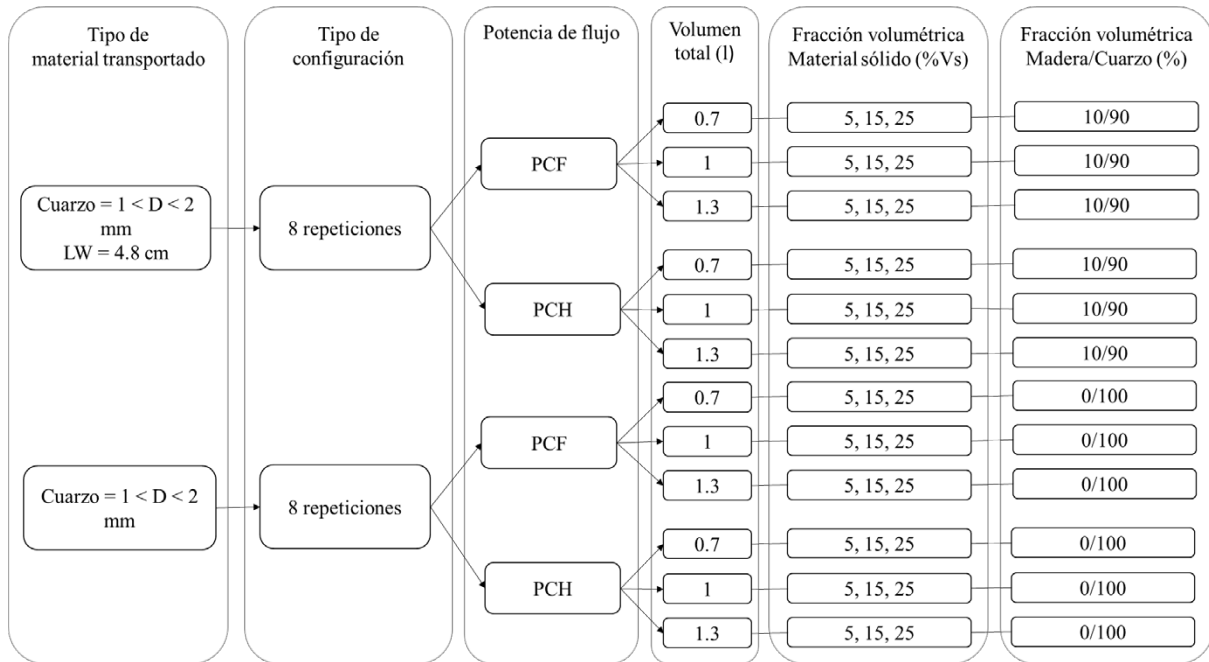

**Figura 3 |** Diseño experimental desglosado según las variables y los respectivos valores considerados para la determinación de las condiciones de carga inicial; PCF: Potencia de flujo máxima, PCH: Potencia de flujo media.

Donde,  $V_{agua}$ : Volumen agua ( $cm^3$ );  $M_{cuarzo}$ : Masa cuarzo (g);  $V_t$ : Volumen total (L); %Vs: Porcentaje volumen de sedimento;  $\rho_{cuarzo}$ : Densidad cuarzo ( $g/cm^3$ );  $M_{madera}$ : Masa madera (g) y  $\rho_{madera}$ : Densidad madera ( $g/cm^3$ ).

**Tabla 1 |** Medidas del diseño experimental.

| $V_t$ (L) | % Vs | Cuarzo                |                  | Cuarzo y madera       |                  |                  |
|-----------|------|-----------------------|------------------|-----------------------|------------------|------------------|
|           |      | $V_{agua}$ ( $cm^3$ ) | $M_{cuarzo}$ (g) | $V_{agua}$ ( $cm^3$ ) | $M_{cuarzo}$ (g) | $M_{madera}$ (g) |
| 0.7       | 5    | 665                   | 90.3             | 665                   | 81.3             | 2.5              |
|           | 15   | 595                   | 270.9            | 595                   | 243.8            | 7.4              |
|           | 25   | 525                   | 451.5            | 525                   | 406.4            | 12.3             |
| 1         | 5    | 950                   | 129              | 950                   | 116.1            | 3.5              |
|           | 15   | 850                   | 387              | 850                   | 348.3            | 10.5             |
|           | 25   | 750                   | 645              | 750                   | 580.5            | 17.5             |
| 1.3       | 5    | 1235                  | 167.7            | 1235                  | 150.9            | 4.6              |
|           | 15   | 1105                  | 503.1            | 1105                  | 452.8            | 13.7             |
|           | 25   | 975                   | 838.5            | 975                   | 754.7            | 22.8             |

### Ejecución del programa experimental

Antes de la ejecución del experimento, se ubicó el material (cuarzo; cuarzo + LW) en la sección intermedia del canal. En los experimentos con madera, su orientación fue perpendicular al eje del canal. Una vez listos los elementos necesarios para el experimento (agua, material y sistema de grabación), se daba inicio a este.

Finalizado cada experimento, se recolectó el material sólido en las zonas del modelo experimental (canal, abanico aluvial y piscina de recolección con tamiz). El sedimento recolectado fue secado en una mufla (370°C durante 120 minutos) y luego fue pesado. Posterior a ello, se verificó que el material ponderado (%canal +%abanico +%tamiz=100%) se encontrara dentro de un margen de error del 3%; en caso de lo contrario, se procedió a repetir el experimento (Figura 4).

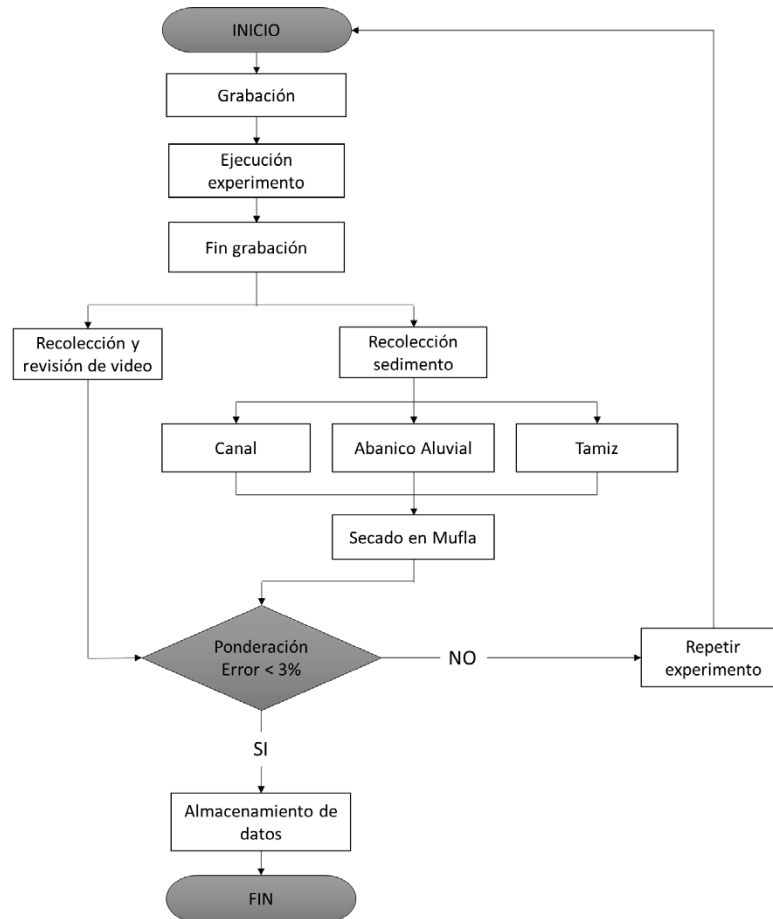

**Figura 4** | Diagrama de flujo que refleja las distintas fases de ejecución del programa experimental.

En los análisis estadísticos, se efectuó estadística descriptiva de los factores de cada variable estudiada (volumen, exposición, cantidad de avulsiones y distancia radial) para observar la distribución y aleatoriedad de los experimentos. Para comprobar la interacción entre los factores, se aplicó el análisis de varianza (ANOVA) multifactorial, con un nivel de confianza del 95% y 99%.

### Cuantificación del balance de sedimento y LW

Para cada experimento, el material transportado fue secado y ponderado, registrándose la fracción del volumen ubicado en cada zona del modelo experimental (canal, abanico aluvial y tamiz), obteniéndose un total de 864 observaciones. Para verificar la existencia de diferencias significativas entre los volúmenes depositados en las distintas zonas entre los materiales de cuarzo y cuarzo + LW, se aplicó un análisis de varianza (ANOVA) multifactorial, con un nivel de confianza del 99%.

Se definieron 5 factores con efectos fijos en el diseño experimental: A. material transportado (en dos niveles: Cuarzo y Cuarzo + LW), B. potencia de flujo (en dos niveles: PCH y PCF), C. volumen total (en tres niveles: 0.7, 1 y 1.3 l), D. porcentaje volumen de sedimento (en tres niveles: 5, 15 y 25%) y E. zonas (en tres niveles: Abanico, Canal y Tamiz). Posterior a esto, se



realizaron pruebas de comparación de medias a fin de saber las relaciones entre los tratamientos (pruebas *post hoc*) utilizando el método de Tukey (DHS). El análisis estadístico se efectuó usando el software STATGRAPHICS Centurion XV.

### Cuantificación de la exposición en el abanico aluvial

En el análisis de las áreas del abanico aluvial se utilizó el software QGIS. En este se ingresa al programa la última imagen del video a analizar (Figura 5A), esta imagen fue extraída mediante un código en Python.

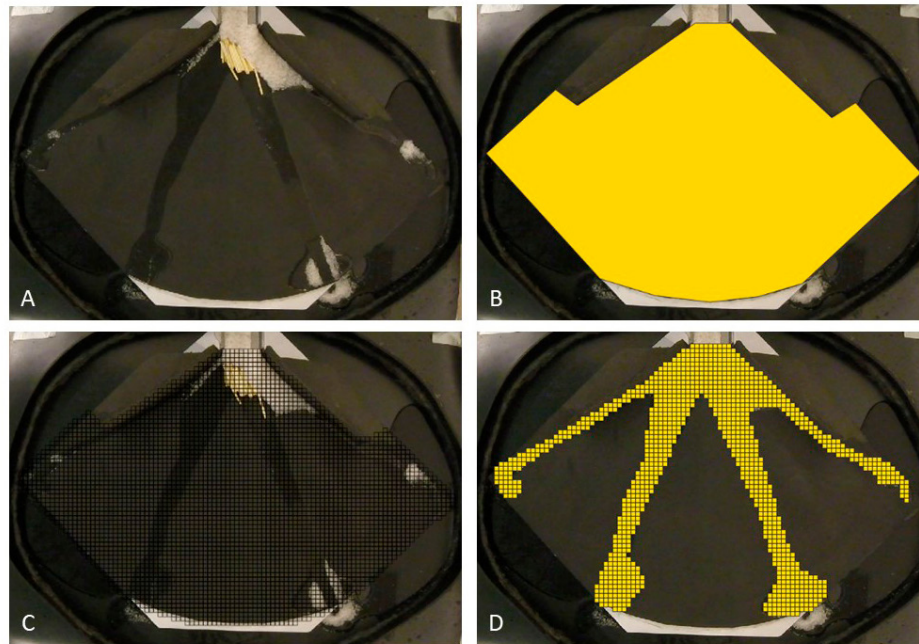

**Figura 5** | Análisis en el software QGIS, experimento con cuarzo + LW,  $V_t = 1.3$  L, PCH (potencia de flujo media) y  $V_s = 15\%$ . A: Imagen a analizar; B: Creación de polígono que limita las áreas que pueden ser inundadas; C: Grilla aplicada sobre el polígono delimitado; D: Área inundada delimitada mediante grilla.

Luego se procede a identificar el polígono del abanico aluvial, por lo que se limita toda el área que puede ser inundada (Figura 5B). Posterior a esto se aplica una grilla sobre el polígono ya delimitado (Figura 5C). Esta grilla tiene un tamaño de cuadro de dos tipos, el cual depende del tamaño de la imagen que se ingresa, ya que se utilizaron dos tipos de cámaras durante el transcurso de los experimentos, esto se debió principalmente con el fin de mejorar el procesamiento de estas; uno es de  $0.7 \times 0.7$  cm aproximadamente y el otro es de  $0.5 \times 0.5$  cm. Finalmente se delimita el área inundada (Figura 5D), obteniendo así un cuadro resumen que indica los cuadros que fueron inundados respecto al total que se encuentra en el polígono.

Por último, en el software STATGRAPHICS Centurion XV, se consideró un diseño experimental de 4 factores con efectos fijos: A. condición de material transportado (en dos niveles: Cuarzo y Cuarzo + LW), B. potencia de flujo (en dos niveles: PCH y PCF), C. volumen total (en tres niveles: 0.7, 1 y 1.3 L) y D. porcentaje volumen de sedimento (en tres niveles: 5, 15 y 25%). La variable de respuesta corresponde a la exposición porcentual en el abanico aluvial experimental. En total, se obtuvieron 288 observaciones.

### Avulsiones: cantidad y distancia radial

A partir de las grabaciones, se contabilizó la cantidad de avulsiones durante el transcurso y al final de cada experimento con y sin LW, con el fin de determinar si existen diferencias entre ambas condiciones y si hay alguna influencia entre los factores aplicados en el análisis (Figura 6). Los datos fueron ingresados al software STATGRAPHICS Centurion XV y se consideraron

5 factores con efectos fijos. Los factores corresponden a: A. material transportado (en dos niveles: Cuarzo y Cuarzo + LW), B. potencia de flujo (en dos niveles: PCH y PCF), C. volumen total (en tres niveles: 0.7, 1 y 1.3 L), D. porcentaje volumen de sedimento (en tres niveles: 5, 15 y 25%) y E. instante de la avulsión (en dos niveles: Durante y Final). La variable de respuesta viene dada por la cantidad de avulsiones que ocurren durante un experimento en el abanico aluvial experimental y cuantas quedan al final de este. Se efectuaron 576 observaciones.

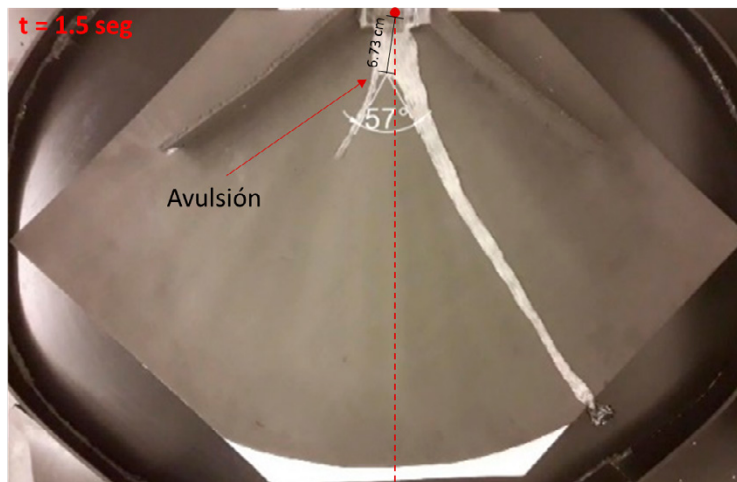

**Figura 6** | Identificación de avulsión y distancia radial (6.73 cm) en el experimento con Cuarzo;  $V_t = 1$  L; PCH (potencia de flujo media) y  $V_s = 15\%$  en el instante de tiempo 1.5 segundos.

Otra variable respuesta considerada en el análisis, fue la ubicación de las avulsiones respecto al ápice del abanico aluvial experimental (distancia radial). Se analizaron al azar dos experimentos de iguales condiciones, en donde se revisa cada fotograma del video y se almacena la imagen justo cuando ocurre una avulsión. Posterior a esto se ingresan las imágenes al AutoCAD para identificar las avulsiones y luego en Microsoft Paint para determinar la ubicación del vértice de la avulsión respecto al punto medio del ápice del abanico.

Los datos obtenidos son ingresados a STATGRAPHICS Centurion XV considerando: A. material transportado (en dos niveles: Cuarzo y Cuarzo + LW), B. potencia de flujo (en dos niveles: PCH y PCF), C. volumen total (en tres niveles: 0.7, 1 y 1.3 L) y D. porcentaje volumen de sedimento (en tres niveles: 5, 15 y 25%). La variable de respuesta corresponde a la distancia radial desde las avulsiones al ápice del abanico. Se efectuaron 229 observaciones.

## RESULTADOS

### Aleatoriedad de la dinámica distributiva

Un importante cuestionamiento presentado en la introducción se refiere a la potencial aleatoriedad de la dinámica distributiva. Nuestra investigación pudo comprobar la existencia de una notable aleatoriedad de la dinámica distributiva que se manifiesta al repetir ocho veces los experimentos con las mismas condiciones de carga, o sea al generar repeticiones experimentalmente indiscernibles. En los anexos (de A a F) y a continuación reportamos los gráficos (i.e. boxplots) relativos a la variabilidad de la repuesta experimental en relación a las configuraciones experimentales definidas. La variabilidad de la exposición se ve reflejada en la exposición y en el número de avulsiones (Figura 7). Al fijar los niveles de las distintas variables y al considerar separadamente las configuraciones experimentales los rangos de variabilidad de las respuestas aleatorias consideradas son generalmente amplios.

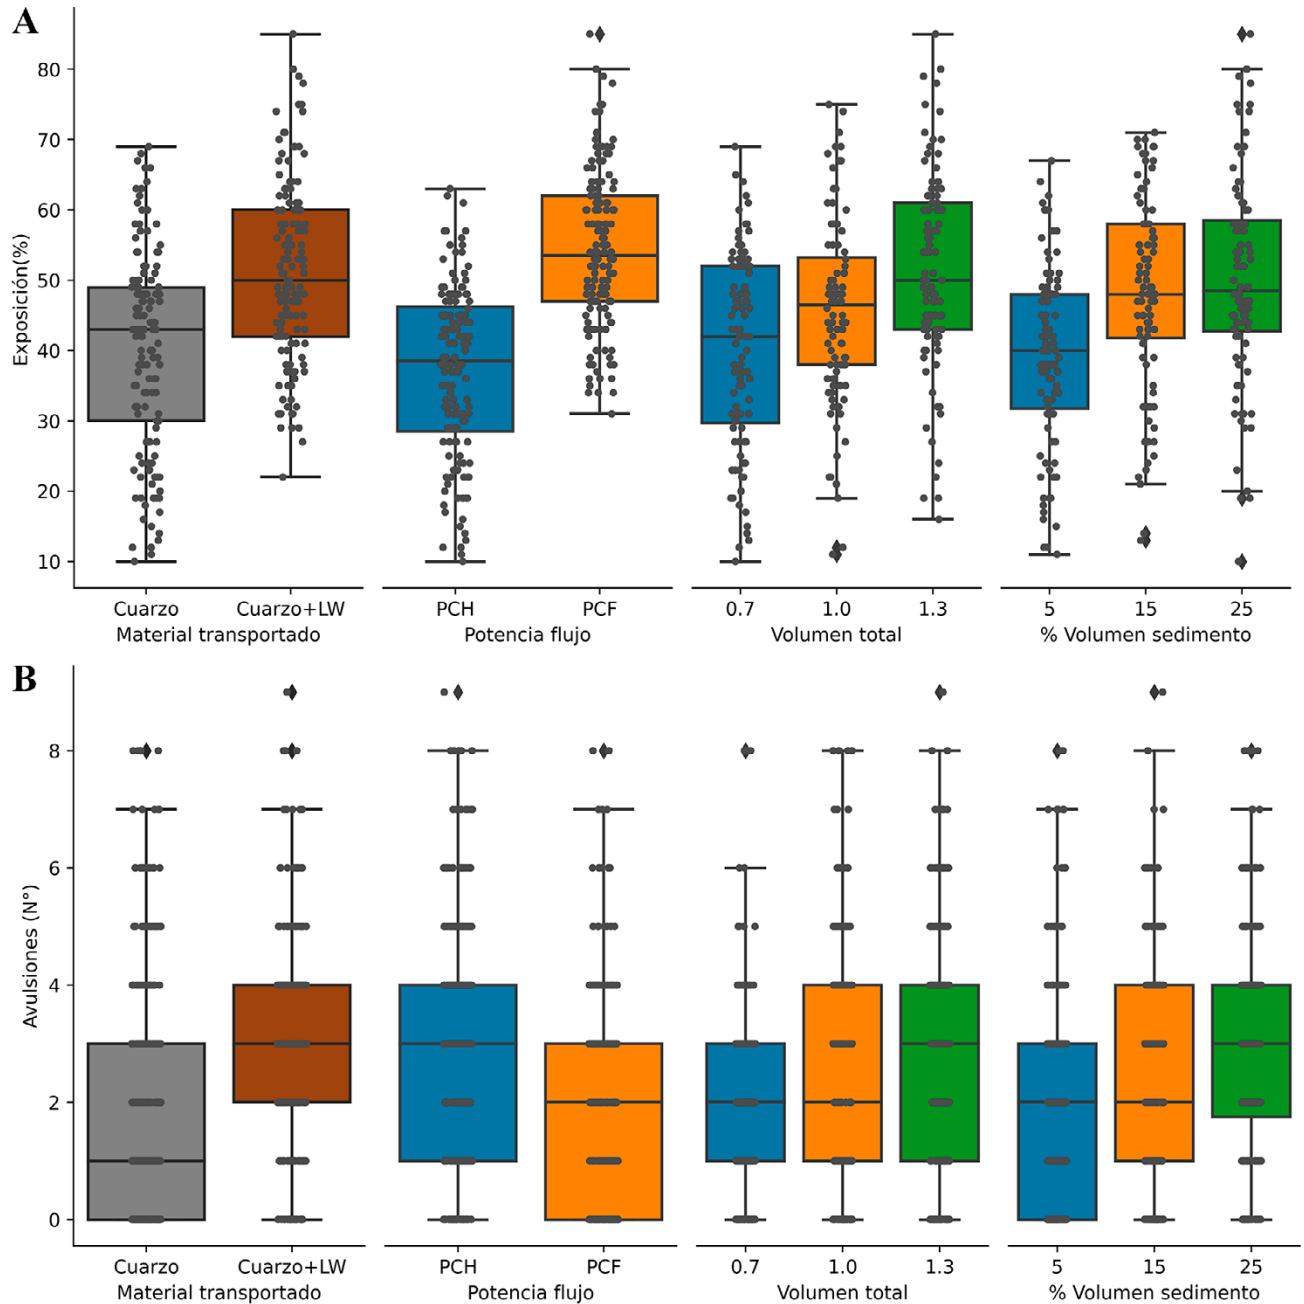

**Figura 7** | Boxplots de los experimentos de exposición (A) y Avulsiones (B). Los boxplots se separaron para cada uno de los factores ingresados en el ANOVA.

Según el análisis estadístico de la interacción entre el material transportado y la potencia de flujo, se obtuvo que es mayor la cantidad de avulsiones cuando se consideraba cuarzo + LW como material transportado y además se pudo observar una mayor cantidad de avulsiones asociada a una potencia de flujo media (Figura 8).

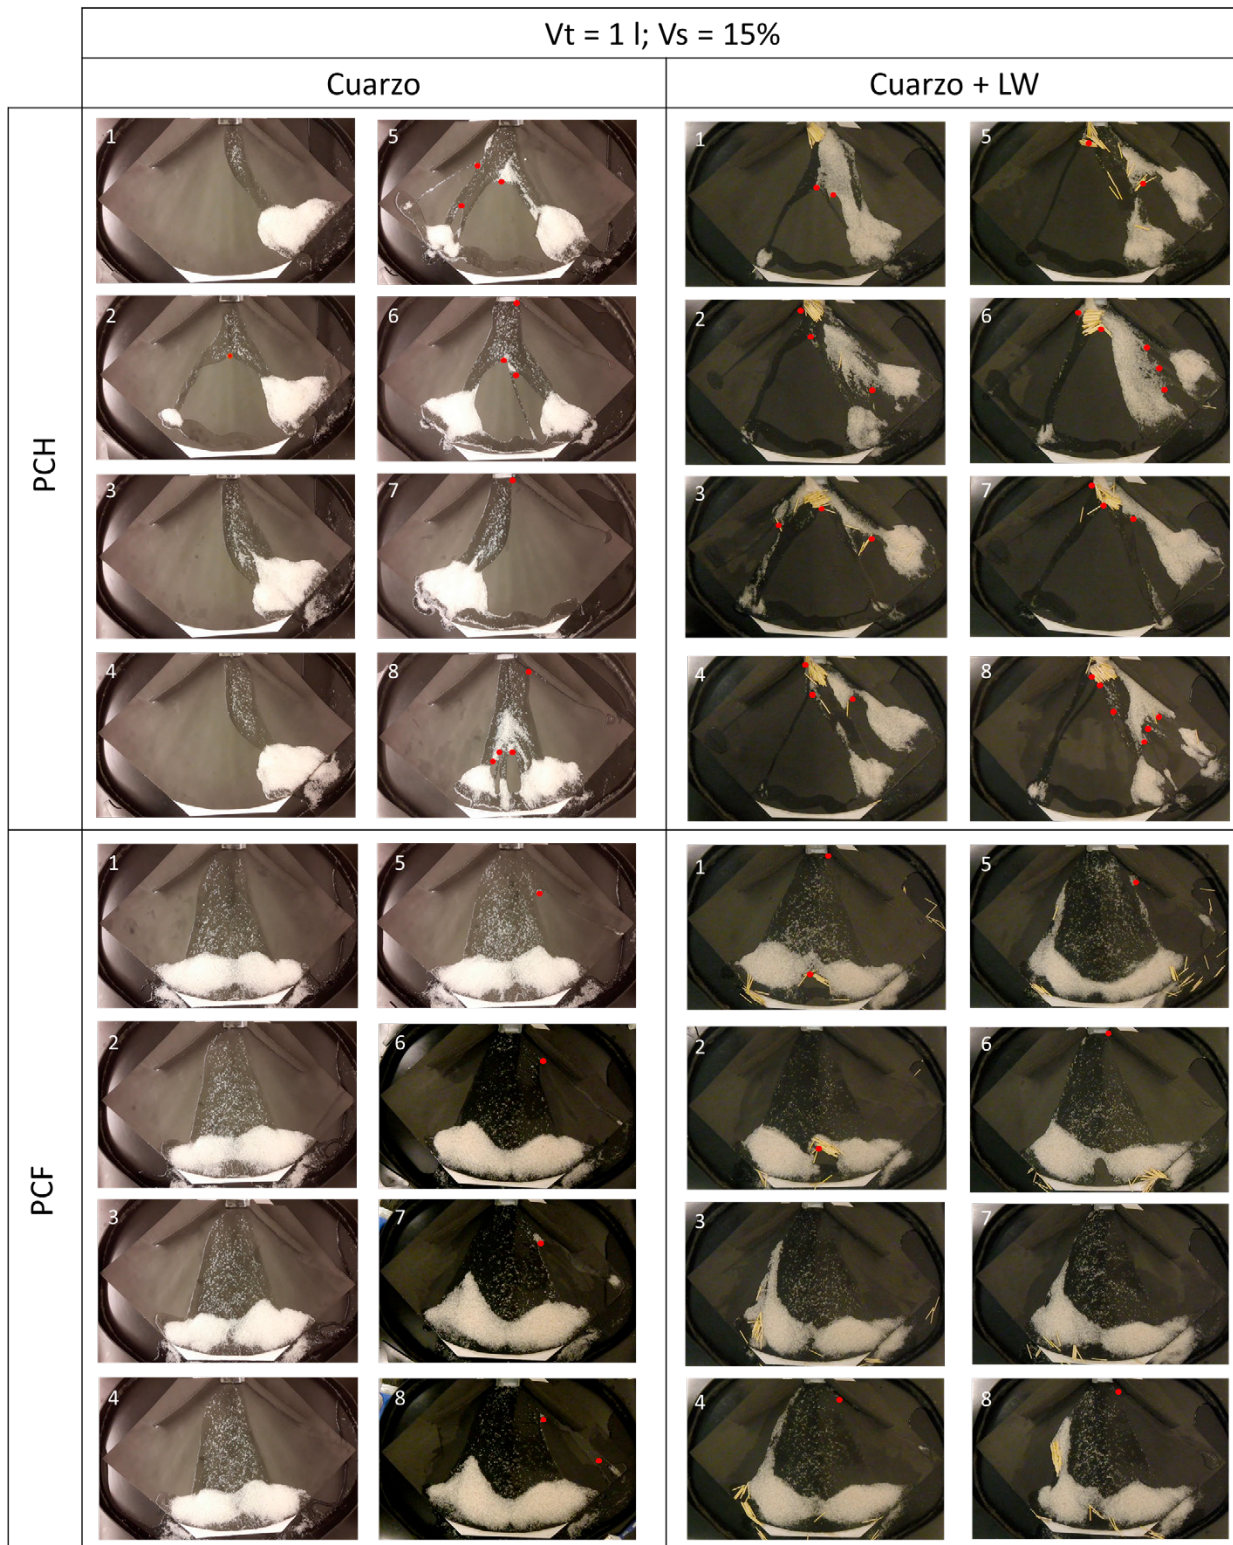

**Figura 8** | Experimentos con  $V_t=1$  L y  $V_s=15\%$ . En las imágenes se observa la exposición en el abanico aluvial al terminar la ejecución del respectivo experimento y además se indica la ubicación de las avulsiones (puntos rojos). (PCF: Potencia de flujo máxima, PCH: Potencia de flujo media).

## Balance de sedimento y LW

En el análisis ANOVA (Tabla 2) el factor E (zonas), obtuvo diferencias altamente significativas con respecto a las medias del porcentaje de volumen de sedimento que queda depositado en las distintas zonas del modelo experimental ( $p$ -valor < 0.01), concentrándose la mayor cantidad de sedimento en la zona de abanico aluvial (Media,  $\mu$ =52.22%) en contraste del canal ( $\mu$ =30.97%) y el tamiz ( $\mu$ =16.81%). Además, todas las interacciones en que el factor E (zonas) se ve involucrado (AE, BE, CE y DE), se obtienen diferencias altamente significativas ( $p$ -valor < 0.01) a nivel de sus medias.

**Tabla 2** | Análisis ANOVA, la variable de respuesta es el porcentaje de volumen de sedimento para los factores: A. Material transportado, B. Potencia de flujo, C. % Volumen de sedimento, D. Volumen total y E. Zonas. (\*\* Diferencias altamente significativas; NS No hay diferencias significativas)

| FACTORES                 | Razón-F | P-valor | Significancia |
|--------------------------|---------|---------|---------------|
| A: Material transportado | < 0.01  | 0.99    | NS            |
| B: Potencia flujo        | < 0.01  | 0.99    | NS            |
| C: Volumen total         | < 0.01  | 1.00    | NS            |
| D: % Volumen sedimento   | < 0.01  | 1.00    | NS            |
| E: Zonas                 | 552.35  | < 0.01  | **            |
| INTERACCIONES            |         |         |               |
| AE                       | 48.89   | < 0.01  | **            |
| BE                       | 325.68  | < 0.01  | **            |
| CE                       | 37.14   | < 0.01  | **            |
| DE                       | 153.21  | < 0.01  | **            |

Realizando pruebas de comparación de medias (Método de Tukey), la interacción entre material transportado y las zonas del modelo experimental (Figura 9A), se observa en el abanico aluvial mayor concentración de sedimento en la condición cuarzo +LW ( $\mu$ =58.3%), con respecto a la condición de solo cuarzo ( $\mu$ =46.15%) obteniéndose diferencias altamente significativas a nivel de sus medias ( $p$ -valor < 0.01), lo que en consecuencia está directamente relacionado con lo que ocurre en el canal, ya que queda depositado menor volumen de sedimento en la condición cuarzo +LW ( $\mu$ =28.58%) que la condición de solo cuarzo ( $\mu$ =33.37%) a nivel de sus medias, por ende existe una mayor movilidad del material transportado entre el canal y abanico aluvial para la condición cuarzo +LW.

Otra interacción importante en el análisis es entre la potencia de flujo y las zonas del modelo experimental (Figura 9B): Se puede observar en la zona del abanico aluvial que se deposita mayor volumen de sedimento cuando se considera una potencia de flujo máxima (PCF), en comparación con la potencia de flujo media (PCH) ( $\mu$ =60.46% y  $\mu$ =43.99% respectivamente), obteniendo diferencias altamente significativas ( $p$ -valor < 0.01).

Considerando la interacción entre el volumen total y las zonas del modelo experimental (Figura 9C), se observa que en la zona del abanico aluvial la condición 1 ( $\mu$ =55.50%) y 1,3 L ( $\mu$ =58.11%) no tienen diferencias significativas con respecto al volumen de sedimento que queda depositado, pero si existe diferencias altamente significativas ( $p$ -valor < 0.01) con respecto a la condición 0.7 L ( $\mu$ =43.06%) siendo menor el porcentaje de volumen de sedimento que queda en el abanico aluvial en comparación de las condiciones 1 y 1.3 L. Esto además se ve reflejado en el canal, ya que al igual de lo que ocurre en el abanico, las condiciones 1 ( $\mu$ =28.52%) y 1,3 L ( $\mu$ =24.55%) no tienen diferencias significativas a nivel de sus medias, pero si ambas tienen diferencias altamente significativas con respecto a la condición 0.7 L ( $\mu$ =39.84%), donde este último a diferencia de lo que sucede en el abanico, queda depositado mayor porcentaje de volumen de sedimento en el canal, en comparación de las condiciones 1 y 1.3 L.

## Exposición en el abanico aluvial

Se obtuvieron diferencias altamente significativas ( $p$ -valor < 0.01) a nivel de las medias del porcentaje de exposición, en todos los factores que se consideraron en el análisis (ANOVA multifactorial, Tabla 3).

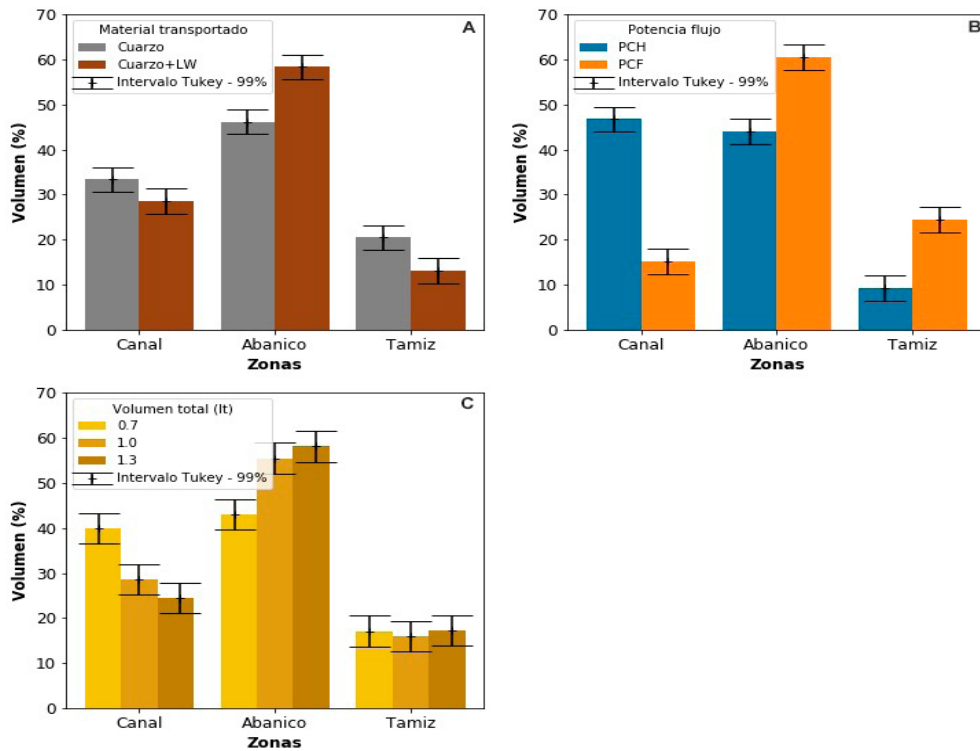

**Figura 9** | Pruebas *a posteriori* del porcentaje de volumen depositado, usando el método Tukey HSD con un 99% de confianza, entre los factores. A: Relación entre el material transportado y las zonas del modelo experimental; B: Relación entre la potencia de flujo y las zonas del modelo experimental y C: Relación entre el volumen total y las zonas del modelo experimental. (PCF: Potencia de flujo máxima, PCH: Potencia de flujo media).

**Tabla 3** | Análisis ANOVA, la variable respuesta es el% área inundada para los factores: A. Material transportado, B. Potencia de flujo, C.% Volumen de sedimento y E. Volumen total. (\*\* Diferencias altamente significativas)

| FACTORES                 | Razón-F | P-valor | Significancia |
|--------------------------|---------|---------|---------------|
| A: Material transportado | 133.55  | < 0.01  | **            |
| B: Potencia flujo        | 347.75  | < 0.01  | **            |
| C: Volumen total         | 49.58   | < 0.01  | **            |
| D: % Volumen sedimento   | 51.24   | < 0.01  | **            |
| INTERACCIONES            |         |         |               |
| AC                       | 5.43    | < 0.01  | **            |
| AD                       | 5.39    | ≤0.01   | **            |

Aplicando el método de Tukey, el factor A (material transportado) presenta una mayor exposición cuando se considera como condición cuarzo + LW ( $\mu=51.00\%$ ) a diferencia de cuando se considera solo cuarzo ( $\mu=40.34\%$ ), obteniendo diferencias altamente significativas (Figura 10A). Respecto al factor B (potencia de flujo), se observa que es mayor la exposición cuando se tiene una potencia de flujo máxima (PCF) en contraste de una potencia de flujo media (PCH), donde sus medias son  $\mu=54.27\%$  y  $\mu=37.07\%$  respectivamente (Figura 8B).

Las figuras 10C y 10D, presentan las interacciones entre material transportado y el volumen total (AC) y entre material transportado y el porcentaje de volumen de sedimento (AD) respecto a la exposición en el abanico aluvial. Respecto a esto, se observa que en todas las condiciones del volumen total es mayor la exposición cuando se considera cuarzo + LW con respecto

a la condición solo cuarzo (Figura 10C). Similar comportamiento cuando se considera como factor el porcentaje de volumen de sedimento (Figura 10D), ya que sigue siendo mayor la exposición considerando los experimentos con cuarzo + LW. Estas relaciones nos indican que indistintamente el % del volumen total o el % de volumen de sedimento que se utilice, el material cuarzo + LW genera mayor % de exposición.

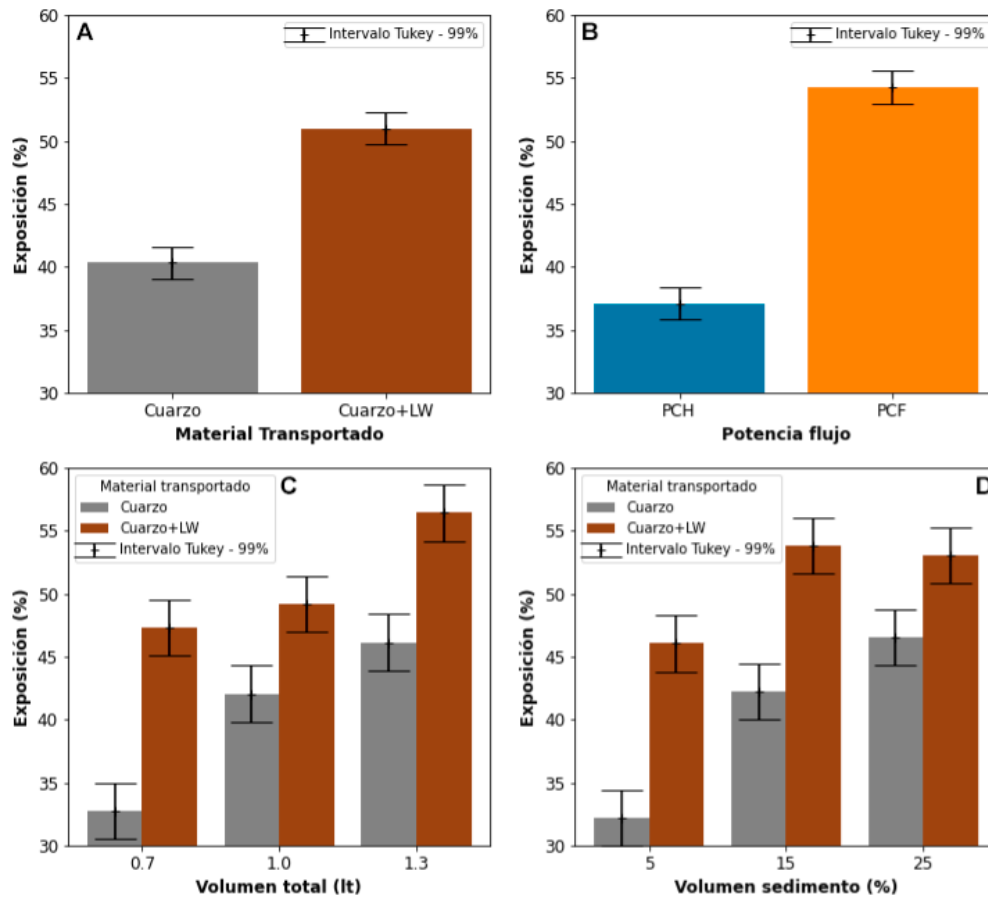

**Figura 10** | Pruebas *a posteriori* del porcentaje de exposición en el abanico aluvial, usando el método Tukey HSD con un 99% de confianza. A: material transportado; B: potencia de flujo; C: Relación entre material transportado y el volumen total; y D: Relación entre material transportado y el volumen de sedimento. (PCF: Potencia de flujo máxima, PCH: Potencia de flujo media).

## Avulsiones: cantidad y distancia radial

Para el número de avulsiones, el análisis ANOVA multifactorial (Tabla 4) mostró diferencias altamente significativas ( $p$ -valor < 0.01) en los valores medios de la variable de respuesta, lo cual se ve reflejado en todos los factores involucrados en el análisis. La variabilidad también se observa entre las distintas interacciones, con diferencias tanto significativas (Interacción – BD;  $p$ -valor < 0.05) como altamente significativas (Interacción – AB, BD y BE;  $p$ -valor < 0.01) a nivel de sus medias.

A partir de las pruebas de comparación de medias (Pruebas *post hoc*), se obtuvo el gráfico de interacción (Figura 11A; Interacción - AB) entre A (material transportado) y B (potencia de flujo), y se puede evidenciar que existe un mayor número de avulsiones cuando se considera como material transportado, cuarzo + LW a diferencia de utilizar solo cuarzo. Esto se ve reflejado considerando tanto una potencia de flujo media (PCH) como una potencia de flujo máxima (PCF), además, se observa una mayor cantidad de avulsiones cuando se aplica una potencia de flujo media (PCH).

**Tabla 4** | Análisis ANOVA, número de avulsiones en el abanico aluvial para los factores: A. Material transportado, B. Potencia de flujo, C.% Volumen de sedimento, D. Volumen total y E. Instante de la avulsión. (\*\*Diferencia altamente significativa; \*Diferencia significativa).

| FACTORES                 | Razón-F | P-valor | Significancia |
|--------------------------|---------|---------|---------------|
| A: Material transportado | 78.92   | < 0.01  | **            |
| B: Potencia flujo        | 92.44   | < 0.01  | **            |
| C: Volumen total         | 26.48   | < 0.01  | **            |
| D: % Volumen sedimento   | 32.27   | < 0.01  | **            |
| E: Instante              | 97.93   | < 0.01  | **            |
| INTERACCIONES            |         |         |               |
| AB                       | 11.00   | < 0.01  | **            |
| BC                       | 8.68    | < 0.01  | **            |
| BD                       | 3.39    | 0.04    | *             |
| BE                       | 28.53   | < 0.01  | **            |

Respecto al gráfico de interacción (Figura 11B; Interacción - BC) entre B (potencia de flujo) y C (volumen total), se observa tendencialmente que a medida aumenta el volumen total de los experimentos, aumenta la cantidad de avulsiones, pero esto es solo considerando una potencia de flujo media (PCH) habiendo diferencias altamente significativas en relación con sus medias. Ahora bien, si consideráramos una potencia de flujo máxima (PCF) se tiene que, no existen diferencias a nivel medio del número de avulsiones respecto al volumen total que se considere en los experimentos.

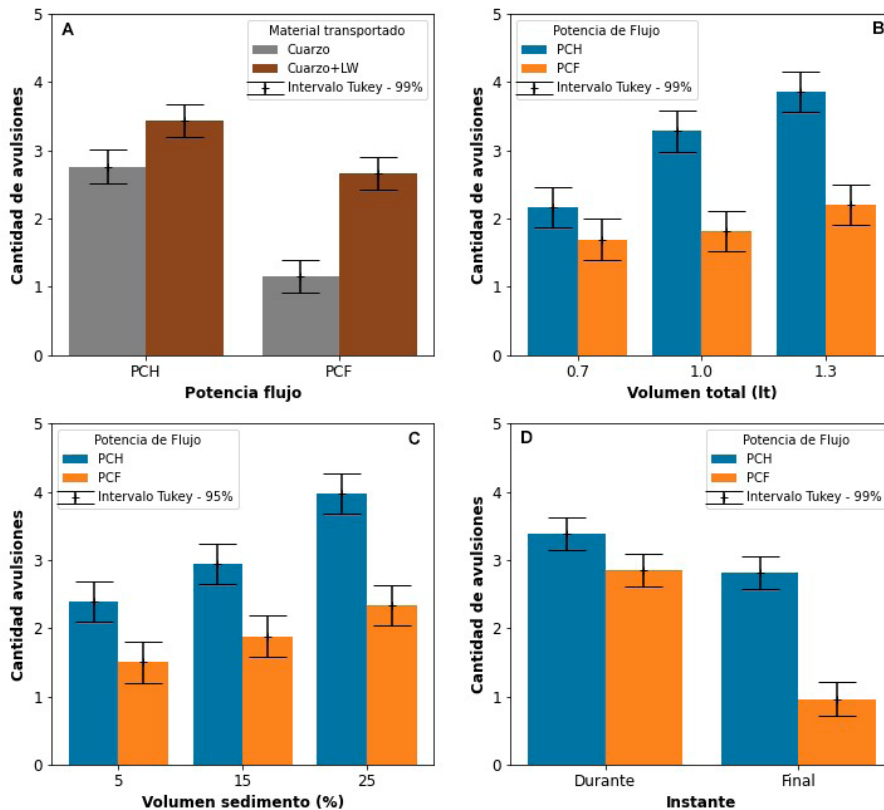**Figura 11** | Pruebas *a posteriori*, número de avulsiones, método Tukey HSD con un 99% y 95% (interacción volumen sedimento- potencia de flujo) de confianza. A: Relación entre Material transportado y potencia de flujo; B: Relación entre la potencia de flujo y volumen total; C: Relación entre la potencia de flujo y el volumen de sedimento; y D: Relación entre la potencia de flujo y el instante de la avulsión. (PCF: Potencia de flujo máxima, PCH: Potencia de flujo media).



Algo similar se puede observar en el gráfico de interacción (Figura 11C; Interacción - BD) entre B (potencia de flujo) y D (% volumen de sedimento), ya que tendencialmente se tiene que, a medida aumenta el porcentaje de volumen de sedimento, aumenta la cantidad de avulsión, lo cual ocurre solo cuando hay una potencia de flujo media (PCH). Puesto que, para la potencia de flujo máxima, no hay diferencias significativas a nivel medio de la cantidad de avulsiones en relación con el volumen total de los experimentos.

Finalmente, analizando el gráfico de interacción (Figura 11D; Interacción - BE) entre B (potencia de flujo) y E (instante en que ocurre una avulsión), se aprecia que es mayor el número de avulsiones durante los experimentos que al final, esto se cumple considerando una potencia de flujo media, como una potencia de flujo máxima.

Siguiendo con el análisis de la dinámica distributiva, se determinó la distancia radial entre la parte media del ápice del abanico aluvial y la posición donde se genera una avulsión, del cual se obtuvo mediante el análisis ANOVA multifactorial (Tabla 5) diferencias altamente significativas en casi todos los factores considerados (Factor - A, B y D;  $p$ -valor < 0.01), excepto en el factor C (volumen total), el cual no tiene diferencias a nivel de sus medias.

Analizando la interacción entre C (volumen total) y D (% volumen sedimento) (Tabla 5), existen diferencias altamente significativas ( $p$ -valor < 0.01) en relación con las medias de la distancia radial de las avulsiones.

**Tabla 5** | Análisis ANOVA, distancia radial respecto al ápice del abanico aluvial para los factores: A. Material transportado, B. Potencia de flujo, C. Volumen total y D. % Volumen sedimento. (\*\* Diferencias altamente significativas).

| FACTORES                 | Razón-F | P-valor | Significancia |
|--------------------------|---------|---------|---------------|
| A: Material transportado | 9.30    | < 0.01  | **            |
| B: Potencia flujo        | 89.39   | < 0.01  | **            |
| C: Volumen total         | 1.29    | 0.28    | NS            |
| D: % Volumen sedimento   | 5.46    | ≤ 0.01  | **            |
| INTERACCIONES            |         |         |               |
| CD                       | 5.32    | < 0.01  | **            |

Realizando pruebas de comparación de medias, se observa en la Figura 12A que es mayor la distancia radial cuando se tiene solo cuarzo ( $\mu=24.20\%$ ), en contraste de la condición cuarzo + LW ( $\mu=20.74\%$ ). Respecto a la potencia de flujo (Figura 12B) se tiene que a mayor potencia de flujo (PCF) mayor es la distancia radial, a diferencia de lo que ocurre considerando una potencia de flujo media (PCH) donde la distancia radial es menor ( $\mu=27.74\%$  y  $\mu=17.21\%$  respectivamente). Finalmente analizando el porcentaje de volumen sedimento (Figura 12C), se observa tendencialmente que a medida aumenta el % volumen de sedimento, disminuye la distancia radial de donde se generan las avulsiones.

## DISCUSIÓN

El comportamiento distributivo generado por procesos de flujo bifásico en los abanicos aluviales es caracterizado por una considerable aleatoriedad en los procesos de depósito, de avulsión y de canalización espontánea. Esta aleatoriedad, postulada por Mazzorana *et al.* (2020) se ve comprobada en esta investigación.

Una variable determinante en la alteración del comportamiento distributivo es el volumen de sedimento que concurre a constituir el flujo bifásico y que es transportado al abanico aluvial y ahí depositado. Por ende, una mejor comprensión de cómo este se distribuye en las distintas zonas del modelo experimental, pudo esclarecer el papel que desempeña este constituyente sólido de la mezcla bifásica en determinar la variabilidad de depósito del sedimento.

El análisis ANOVA multifactorial, reveló que la mayor parte del volumen de sedimento queda depositado en el abanico aluvial, en contraste con el volumen que queda en el canal y en el tamiz. De aquello, se analizó la interacción entre las zonas y los distintos factores que se consideraron en el programa experimental (material transportado, potencia de flujo, volumen total y porcentaje de volumen de sedimento). Respecto a esto, se observó que existe mayor depósito de volumen de sedimento en el

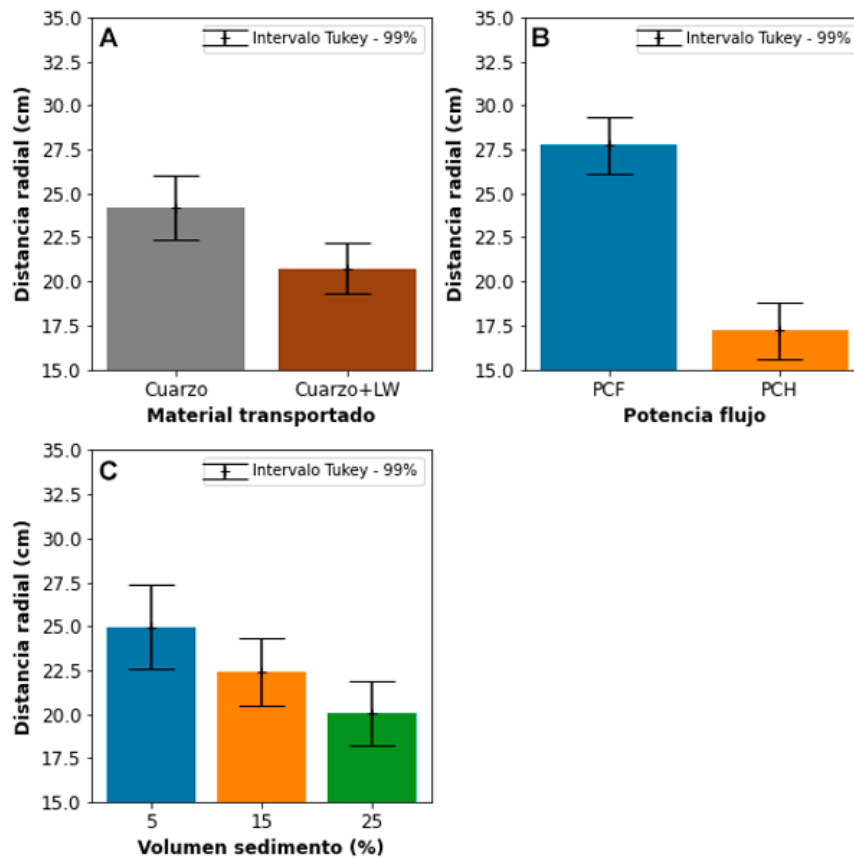

**Figura 12** | Pruebas *a posteriori*, distancias radiales, método Tukey HSD con un 99%. A: Gráfico material transportado; B: Gráfico potencia de flujo; y C: Gráfico % volumen sedimento. (PCF: Potencia de flujo máxima, PCH: Potencia de flujo media).

abanico aluvial cuando se considera como material transportado cuarzo + LW, a diferencia de solo cuarzo; Esto está directamente relacionado con lo que ocurre en la zona del canal, ya que, al haber mayor movilidad de material transportado, es menor el volumen de sedimento que queda en el canal sin ser movilizado. Por lo tanto, se infiere que la madera de gran tamaño (LW) movilizada contribuye también a la movilidad de sedimento. Sin embargo, hay que considerar que en los experimentos la madera de gran tamaño (LW) no ejerció un rol de anclaje para el sedimento, generando acumulaciones localizadas. En el ambiente natural y también en experimentos de laboratorio con mayor dimensión de la madera o troncos con raíces, se observan de hecho acumulaciones y socavaciones localizadas de sedimentos (Mao *et al.*, 2020) que no se pudieron reproducir en este caso.

Otro factor importante en el análisis es la potencia de flujo. Los experimentos indicaron que a mayor potencia de flujo (PCF), mayor era el volumen de sedimento que quedaba depositado en el abanico aluvial. Lo contrario ocurría cuando se imponía una potencia de flujo media (PCH) quedando mayor volumen de sedimento en la zona del canal. Por ende, la potencia de flujo es un factor que también contribuye en la movilidad de sedimento. Considerando los tres niveles de volumen total, se obtuvo que aumentando el volumen total (0.7, 1 y 1.3 L) aumentaba tendencialmente el volumen de sedimento en el abanico aluvial. Pero realizando pruebas de comparación de medias (Método Tukey), se observó que no existen diferencias significativas entre la condición  $Vt=1$  L y  $Vt=1.3$  L, por lo que se propone agregar una nueva condición de volumen total, con el fin de observar que sucedería entre estas condiciones.

Estos resultados reflejan los patrones de exposición observados en el abanico aluvial, ya que se obtuvo una mayor exposición cuando se utilizaba cuarzo + LW como condición del material transportado. Además, se observó una mayor exposición cuando se consideraba una potencia de flujo máxima (PCF) en comparación a la imposición de una potencia de flujo media (PCH). Es

entonces evidente que el volumen de sedimento depositado y la exposición deben exhibir una fuerte correlación positiva como ya evidenciado por Mazzorana *et al.* (2020).

La condición de alimentación cuarzo + LW determina mayor volumen de sedimento depositado y mayor exposición en el abanico aluvial. Similarmente, una alta potencia de flujo determina, un mayor volumen de sedimento y mayor exposición (Figuras 9 y 10).

Por otra parte, la interacción entre el material transportado y el volumen total indica que a medida de que aumenta el volumen total en los experimentos, aumenta la exposición en el abanico aluvial. De forma similar se comporta la interacción entre el material transportado y el porcentaje de volumen de sedimento, ya que si se aumenta el porcentaje volumen sedimento tendencialmente aumenta la exposición a nivel de sus medias. Finalmente, los experimentos demuestran como el comportamiento distributivo puede ser alterado por los procesos autógenos (es decir, bifurcaciones, avulsiones, canalizaciones espontaneas, etc.).

Adicionalmente, se pudo constatar la interacción entre la potencia de flujo y el volumen total. Utilizando una potencia de flujo media (PCH) y un aumento del volumen total generaba un aumento de la cantidad de avulsiones. Por lo contrario, si se imponía una potencia de flujo máxima (PCF), no se pudo constatar diferencias significativas al aumentar el volumen total. La interacción entre la potencia de flujo y el % volumen de sedimento sigue un patrón análogo, evidenciase que con una potencia de flujo media (PCH), y aumentando el % volumen de sedimento, aumentaba también la cantidad de avulsiones. Sin embargo, al considerar una potencia de flujo máxima (PCF) no se pudo comprobar la existencia de diferencias significativas entre los % de volumen de sedimento considerados. Por otra parte, se pudo observar tendencialmente un leve aumento en el promedio de la cantidad de avulsiones a medida que aumentaba el % de volumen de sedimento. Finalmente, también se evidenció que ocurrían más avulsiones en el transcurso de los experimentos que los observables en la imagen final de los mismos.

Respecto a la distancia radial de las avulsiones, se obtuvo que es menor su distancia cuando se considera como material transportado la condición de cuarzo + LW, en comparación de la condición de solo cuarzo; esto coincide con la potencia de flujo media (PCH) donde también es menor la distancia radial, en contraste de lo que ocurre con la potencia de flujo máxima (PCF), debido a que estas se generan mayormente en la parte baja del abanico aluvial. Ahora analizando el % de volumen de sedimento se observó tendencialmente que a medida que este aumenta, disminuye la distancia radial de las avulsiones.

Finalmente, cabe reflexionar sobre la oportunidad de ocupar experimentos físicos basados en el principio de similitud de procesos (Hooke, 1968) para explorar el comportamiento autógeno en la dinámica morfológica en abanicos y en formas deposicionales más en general. Aunque el acercamiento tradicional de escalamiento formal de un modelo permita estudiar procesos de gran envergadura espacial, los requerimientos dimensionales impiden simular la complejidad de sistemas naturales que son intrínsecamente no lineales (Barenblatt, 2003). Por esta razón, experimentos que estudian proceso morfodinámicos no son escalados formalmente sino son independientes de la escala, ya que buscan estudiar procesos y patrones a través de similitud. Este acercamiento es más flexible y ha sido adaptado para estudiar estratigrafías, deltas, corrientes de turbidez, y otros procesos deposicionales complejos (Paola *et al.*, 2009). Aunque no escalados a un prototipo original, los experimentos presentados en este trabajo permiten un alto nivel de reproducibilidad, y también permiten explorar la contribución relativa de elementos complejos (sedimentos, LW, infraestructuras, vegetación, magnitud de eventos, etc.) a la dinámica distributiva en abanicos, que son inalcanzables con acercamientos de escalamiento tradicional.

---

## CONCLUSIÓN

Es importante entender el comportamiento autógeno de la dinámica distributiva que existe en un abanico aluvial, ya que cualquier cambio en el cauce logra fácilmente desviar el curso del agua y afectar todo el sistema. Los estudios de campo son difíciles y costosos, una viable alternativa de análisis son los modelos experimentales, debido a que ofrecen una serie de ventajas tales como aislar, controlar y repetir la veces que sea necesario las distintas condiciones que se deseen simular.

En la actualidad es importante examinar la variabilidad de los patrones de exposición asociados a los flujos bifásicos en abanicos aluviales y determinar si existe alguna influencia tangible en la exposición. Esto se respondió a partir de la ejecución de

una serie de experimentos en un abanico aluvial experimental, en donde se generó un flujo bifásico con y sin transporte de madera de gran tamaño.

Los resultados muestran que existe un considerable grado de aleatoriedad en los patrones de exposición, ya que las mismas condiciones de carga en los experimentos resultan en distintos patrones de exposición. Esta aleatoriedad puede exacerbarse dependiendo de la composición de la mezcla bifásica y, en particular, de la presencia de madera de gran tamaño. El estudio experimental indica que la madera de gran tamaño está asociada a (i) un aumento en el volumen de sedimento depositado en el abanico aluvial, (ii) un aumento de la exposición, (iii) un aumento de la cantidad de avulsiones y (iv) una disminución de la distancia radial de las avulsiones. Un análisis de conjunto muestra que estos procesos están interconectados. Al depositarse un mayor volumen de sedimento, existe una mayor cantidad de avulsiones. A su vez, estas avulsiones al ocurrir más cerca del ápice del abanico pudieron aumentar la exposición al flujo.

Considerando estos resultados, se recomienda evaluar adecuadamente la dinámica distributiva de sedimentos en los análisis del peligro y del riesgo en abanicos aluviales. La variabilidad de este comportamiento condicionada por la ocurrencia de distintos procesos autógenos a menudo no puede ser capturada completamente utilizando modelos computacionales. Por tanto, se sugiere el empleo de modelos experimentales como complemento en el análisis del peligro. En primera instancia es trascendental detectar la potencial variabilidad de los procesos bifásicos y, al constatarla, aumentar la precaución en la planificación territorial.

---

## AGRADECIMIENTOS

El estudio fue desarrollado con el soporte de dos proyectos Fondecyt: (i) “*The flood memory of a river system: using both experimental and field-based approaches to unravel the role of unsteady flow and antecedent flows on sediment dynamics during floods*”. FONDECYT 1170657 (ANID) del investigador principal Luca Mao y (ii) “*Unravelling the dynamics and impacts of sediment-laden flows in urban areas in southern Chile as a basis for innovative adaptation (SEDIMPACT)*” FONDECYT 1200091 (ANID) del investigador principal Bruno Mazzorana.

---

## REFERENCIAS

- Anstey, R.L. 1965. Physical characteristics of alluvial fans. *Natick, MA: Army Natick Laboratory, Technical Report, ES-20*.
- Antronico, L., Greco, R., Robustelli, G., Sorriso-Valvo, M. 2015. Short-term evolution of an active basin-fan system, Aspromonte, south Italy. *Geomorphology*, 228, 536-551. <https://doi.org/10.1016/j.geomorph.2014.10.013>
- Barenblatt, G.I. (2003). *Scaling*. Cambridge University Press, Cambridge. 171 pp.
- Blair, T.C. 2003. Features and origin of the giant Cucomungo Canyon alluvial fan, Eureka Valley, California. *Special Paper of the Geological Society of America*, 370, 105-126. <https://doi.org/10.1130/0-8137-2370-1.105>
- Blair, T.C., McPherson, J.G. 2009. Processes and Forms of Alluvial Fans. In: Parsons A.J., Abrahams A.D. (eds) *Geomorphology of Desert Environments*. Springer, Dordrecht. [https://doi.org/10.1007/978-1-4020-5719-9\\_14](https://doi.org/10.1007/978-1-4020-5719-9_14)
- Bryant, M., Falk, P., Paola, C. 1995. Experimental study of avulsion frequency and rate of deposition. *Geology*, 23(4), 365-368. [https://doi.org/10.1130/0091-7613\(1995\)023%3C0365:ESOFAFA%3E2.3.CO;2](https://doi.org/10.1130/0091-7613(1995)023%3C0365:ESOFAFA%3E2.3.CO;2)
- Chow, V.T. 1994. *Hidráulica de canales abiertos*. McGraw-Hill Interamericana S.A. Santafé de Bogotá, Colombia.
- Clarke, L.E. 2015. Experimental alluvial fans: Advances in understanding of fan dynamics and processes. *Geomorphology*, 244, 135-145. <https://doi.org/10.1016/j.geomorph.2015.04.013>
- Clarke, L., Quine, T.A., Nicholas, A. 2010. An experimental investigation of autogenic behaviour during alluvial fan evolution. *Geomorphology*, 115(3-4), 278-285. <https://doi.org/10.1016/j.geomorph.2009.06.033>

- D'Agostino, V., Cesca, M., Marchi, L. 2010. Field and laboratory investigations of runout distances of debris flows in the Dolomites (Eastern Italian Alps). *Geomorphology*, 115(3-4), 294-304. <https://doi.org/10.1016/j.geomorph.2009.06.032>
- Davies, T.R., McSaveney, M.J., Clarkson, P.J. 2003. Anthropogenic aggradation of the Waiho River, Westland, New Zealand: Microscale modelling. *Earth Surface Processes and Landforms*, 28(2), 209-218. <https://doi.org/10.1002/esp.449>
- De Haas, T., Densmore, A.L., Stoffel, M., Suwa, H., Imaizumi, F., Ballesteros-Cánovas, J.A., Wasklewicz, T. 2018. Avulsions and the spatio-temporal evolution of debris-flow fans. *Earth-Science Reviews*, 177, 53-75. <https://doi.org/10.1016/j.earscirev.2017.11.007>
- Fuchs, S., Keiler, M., Zischg, A. 2015. A spatiotemporal multi-hazard exposure assessment based on property data. *Natural Hazards and Earth System Sciences*, 15(9), 2127-2142. <https://doi.org/10.5194/nhess-15-2127-2015>
- Fuchs, S. 2009. Susceptibility versus resilience to mountain hazards in Austria - Paradigms of vulnerability revisited. *Natural Hazards and Earth System Science*, 9(2), 337-352. <https://doi.org/10.5194/nhess-9-337-2009>
- Fuchs, S., Karagiorgos, K., Kitikidou, K., Maris, F., Paparrizos, S., Thaler, T. 2017a. Flood risk perception and adaptation capacity: A contribution to the socio-hydrology debate. *Hydrology and Earth System Sciences*, 21(6), 3183-3198. <https://doi.org/10.5194/hess-21-3183-2017>
- Fuchs, S., Röthlisberger, V., Thaler, T., Zischg, A., Keiler, M. 2017b. Natural Hazard Management from a Coevolutionary Perspective: Exposure and Policy Response in the European Alps. *Annals of the American Association of Geographers*, 107(2), 382-392. <https://doi.org/10.1080/24694452.2016.1235494>
- Gschnitzer, T., Gems, B., Mazzorana, B., Aufleger, M. 2017. Towards a robust assessment of bridge clogging processes in flood risk management. *Geomorphology*, 279, 128-140. <https://doi.org/10.1016/j.geomorph.2016.11.002>
- Guerit, L., Devauchelle, O., Lajeunesse, E., Barrier, L. 2014. Laboratory alluvial fans in one dimension. *Physical Review E*, 90(2), 1-7. <https://doi.org/10.1103/PhysRevE.90.022203>
- Hooke, R.L. 1968. Model geology: Prototype and laboratory streams: Discussion. *Geological Society of America Bulletin*, 79(3), 391-393. [https://doi.org/10.1130/0016-7606\(1968\)79\[391:MGPALS\]2.0.CO;2](https://doi.org/10.1130/0016-7606(1968)79[391:MGPALS]2.0.CO;2)
- Kain, C.L., Rigby, E.H., Mazengarb, C. 2018. A combined morphometric, sedimentary, GIS and modelling analysis of flooding and debris flow hazard on a composite alluvial fan, Caveside, Tasmania. *Sedimentary Geology*, 364, 286-301. <https://doi.org/10.1016/j.sedgeo.2017.10.005>
- Kienholz, H., Krummenacher, B., Kipfer, A., Perret, S. 2004. Aspects of integral risk management in practice: Considerations with respect to mountain hazards in Switzerland. *Osterreichische Wasser- Und Abfallwirtschaft*, 56(3-4), 43-50.
- Mao, L., Ravazzolo, D., Bertoldi, W. 2020. The role of vegetation and large wood on the topographic characteristics of braided river systems. *Geomorphology*, 367, 107299, <https://doi.org/10.1016/j.geomorph.2020.107299>
- Mazzorana, B., Fuchs, S. 2010. A conceptual planning tool for hazard and risk management. In: Chen SC (Ed.), *Internationales Symposium Interpraevent in the Pacific Rim, Klagenfurt: Internationale Forschungsgesellschaft Interpraevent.*, 828-837.
- Mazzorana, B., Iribarren, P., Oyarzun, C., et al. 2017. Determining patterns of flood hazard exposure on an experimental alluvial fan. *Proceedings XX Congreso Geológico Argentino, Tucumán (7th-11th august)*, Technical (p. session 3: 24-28).
- Mazzorana, B., Ruiz-Villanueva, V., Marchi, L., Cavalli, M., Gems, B., Gschnitzer, T., Mao, L., Iroumé, A., Valdebenito, G. 2018. Assessing and mitigating large wood-related hazards in mountain streams: recent approaches. *Journal of Flood Risk Management*, 11(2), 207-222. <https://doi.org/10.1111/jfr3.12316>
- Mazzorana, B., Levaggi, L., Keiler, M., Fuchs, S. 2012. Towards dynamics in flood risk assessment, 3571-3587. <https://doi.org/10.5194/nhess-12-3571-2012>
- Mazzorana, Bruno, Ghiandoni, E., Picco, L. 2020. How do stream processes affect hazard exposure on alluvial fans? Insights from an experimental study. *Journal of Mountain Science*, 17(4), 753-772. <https://doi.org/10.1007/s11629-019-5788-x>

- Muto, T., Steel, R.J., Swenson, J.B. 2007. Autostratigraphy: A framework norm for genetic stratigraphy. *Journal of Sedimentary Research*, 77(1-2), 2-12. <https://doi.org/10.2110/jsr.2007.005>
- Paola, C., Straub, K., Mohrig, D., Reinhardt, L. 2009. Earth-Science Reviews The “unreasonable effectiveness” of stratigraphic and geomorphic experiments. *Earth Science Reviews*, 97(1-4), 1-43. <https://doi.org/10.1016/j.earscirev.2009.05.003>
- Papathoma-Köhle, M., Gems, B., Sturm, M., Fuchs, S. 2017. Matrices, curves and indicators: A review of approaches to assess physical vulnerability to debris flows. *Earth-Science Reviews*, 171(November 2016), 272-288. <https://doi.org/10.1016/j.earscirev.2017.06.007>
- Peakall, J., Ashworth, P., Best, J. 1996. Physical modelling in fluvial geomorphology: principles, applications and unresolved issues. In: Rhoads, B.L., Thorn, C.E. (Eds.), *The scientific nature of geomorphology*. John Wiley & Sons, Chichester, pp. 221-253.
- Pelletier, J.D., Mayer, L., Pearthree, P.A., House, P.K., Demsey, K.A., Klawon, J.K., Vincent, K.R. 2005. An integrated approach to flood hazard assessment on alluvial fans using numerical modeling, field mapping, and remote sensing. *Bulletin of the Geological Society of America*, 117(9-10), 1167-1180. <https://doi.org/10.1130/B25544.1>
- Reitz, M.D., Jerolmack, D.J. 2012. Experimental alluvial fan evolution: Channel dynamics, slope controls, and shoreline growth. *Journal of Geophysical Research: Earth Surface*, 117(2), 1-19. <https://doi.org/10.1029/2011JF002261>
- Reitz, M.D., Jerolmack, D.J., Swenson, J.B. 2010. Flooding and flow path selection on alluvial fans and deltas, 37, 1-5. <https://doi.org/10.1029/2009GL041985>
- Rosatti, G., Fraccarollo, L. 2006. A well-balanced approach for flows over mobile-bed with high sediment-transport. *Journal of Computational Physics*, 220(1), 312-338. <https://doi.org/10.1016/j.jcp.2006.05.012>
- Rosatti, Giorgio, Begnudelli, L. 2013. Two-dimensional simulation of debris flows over mobile bed: Enhancing the TRENT2D model by using a well-balanced Generalized Roe-type solver. *Computers and Fluids*, 71, 179-195. <https://doi.org/10.1016/j.compfluid.2012.10.006>
- Röthlisberger, V., Zischg, A.P., Keiler, M. 2017. Identifying spatial clusters of flood exposure to support decision making in risk management. *Science of the Total Environment*, 598, 593-603. <https://doi.org/10.1016/j.scitotenv.2017.03.216>
- Ruiz-Villanueva, V., Mazzorana, B., Bladé, E., Bürkli, L., Iribarren-Anacona, P., Mao, L., Nakamura, F., Ravazzolo, D., Rickenmann, D., Sanz-Ramos, M., Stoffel, M., Wohl, E. 2019. Characterization of wood-laden flows in rivers. *Earth Surface Processes and Landforms*, 44(9), 1694-1709. <https://doi.org/10.1002/esp.4603>
- Santangelo, N., Santo, A., Di Crescenzo, G., Foscari, G., Liuzza, V., Sciarrotta, S., Scorpio, V. 2011. Flood susceptibility assessment in a highly urbanized alluvial fan: The case study of Sala Consilina (southern Italy). *Natural Hazards and Earth System Science*, 11(10), 2765-2780. <https://doi.org/10.5194/nhess-11-2765-2011>
- Sheets, B.A., Hickson, T.A., Paola, C. 2002. Assembling the stratigraphic record: depositional patterns and time-scales in an experimental alluvial basin, *Basin Research*, 14(3), 287-301. <https://doi.org/10.1046/j.1365-2117.2002.00185.x>
- Sturm, M., Gems, B., Keller, F., Mazzorana, B., Fuchs, S., Papathoma-Köhle, M., Aufleger, M. 2018a. Experimental analyses of impact forces on buildings exposed to fluvial hazards. *Journal of Hydrology*, 565(March), 1-13. <https://doi.org/10.1016/j.jhydrol.2018.07.070>
- Sturm, M., Gems, B., Keller, F., Mazzorana, B., Fuchs, S., Papathoma-Köhle, M., Aufleger, M. 2018b. Understanding impact dynamics on buildings caused by fluvial sediment transport. *Geomorphology*, 321, 45-59. <https://doi.org/10.1016/j.geomorph.2018.08.016>
- Van Dijk, M., Kleinhans, M.G., Postma, G., Kraal, E. 2012. Contrasting morphodynamics in alluvial fans and fan deltas: Effect of the downstream boundary. *Sedimentology*, 59(7), 2125-2145. <https://doi.org/10.1111/j.1365-3091.2012.01337.x>
- Whipple, K.X., Parker, G., Paola, C., Mohrig, D. 1998. Channel dynamics, sediment transport, and the slope of alluvial fans: Experimental study. *Journal of Geology*, 106(6), 677-693. <https://doi.org/10.1086/516053>

## ANEXOS

Boxplots: Aleatoriedad de las variables Volumen total (Figuras A y B), Exposición (Figuras C y D), Avulsiones (Figura E) y Distancia radial (Figura F).

A | Volumen total (valores absolutos, en  $\text{cm}^3$ ).

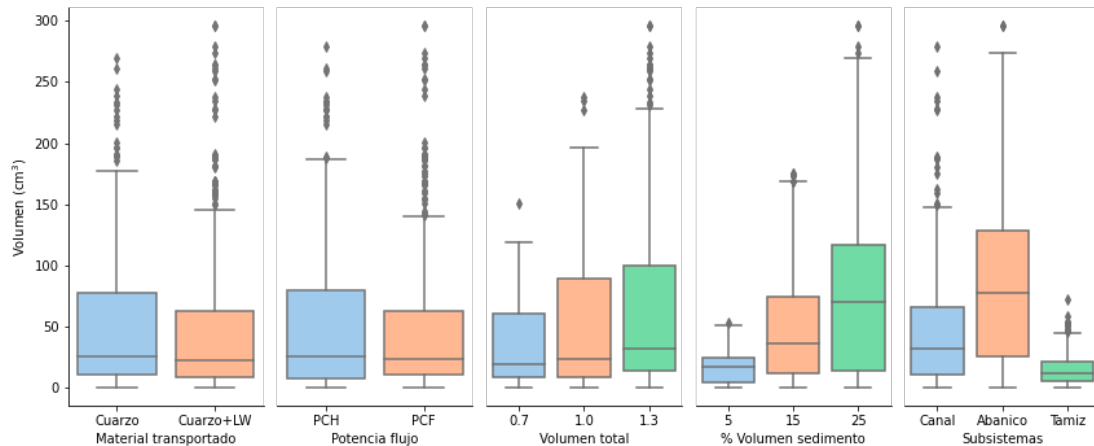

B | Volumen total (valores relativos, en %).

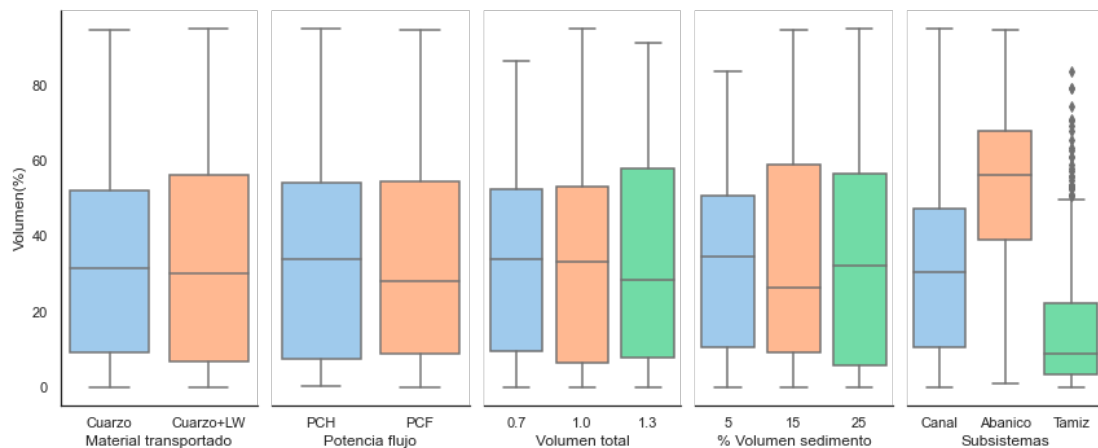

C | Exposición (valores absolutos, en  $\text{cm}^2$ ).

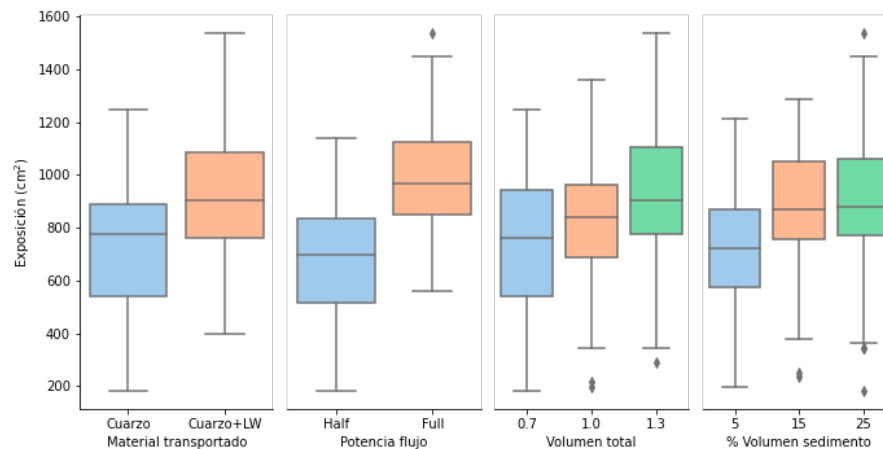

D | Exposición (valores relativos, en %).

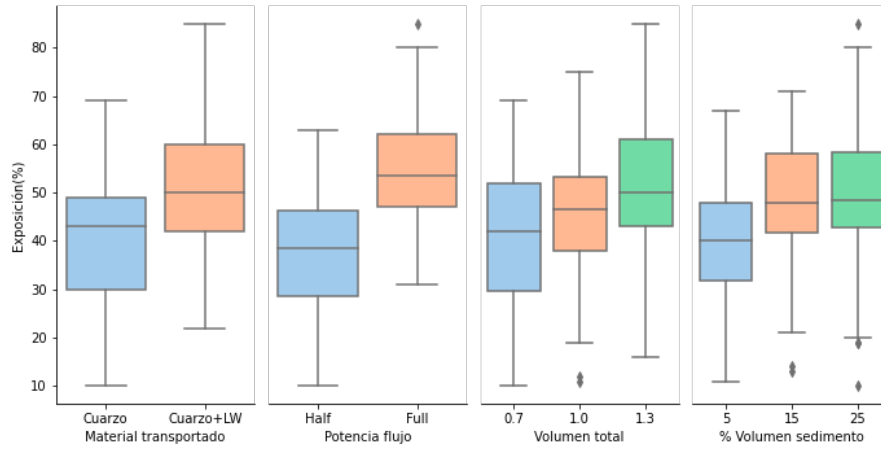

E | Avulsiones (Número).

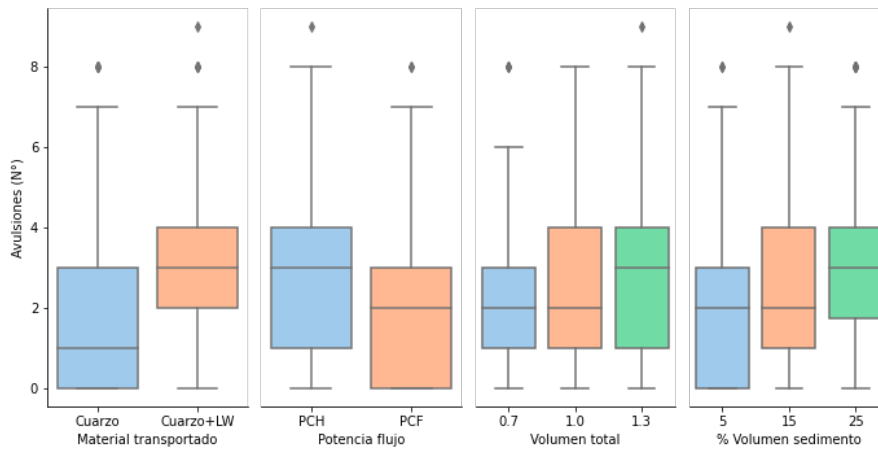

F | Distancia radial (en cm).

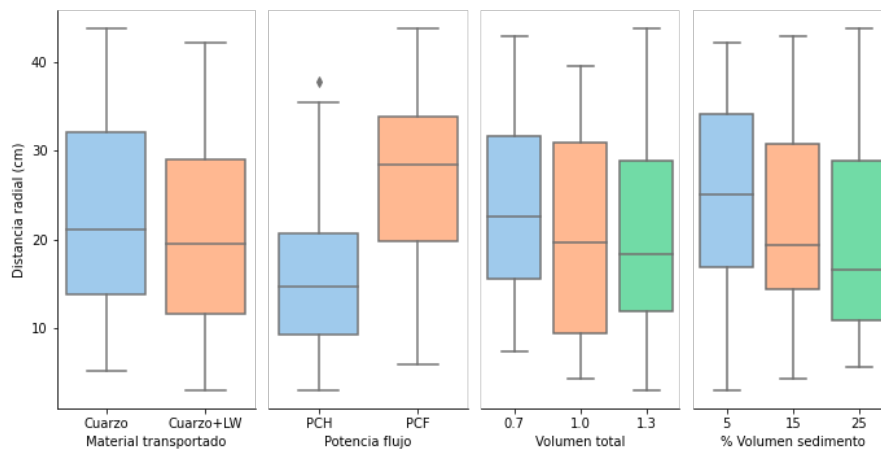

Source: https://iwa.silverchair.com/IA/article-pdf/25/2/145/883656/ia202114703.pdf
